# Supplementary material
Source: publisher figshare collection journal article supplement (https://acs.figshare.com/ndownloader/files/4054015)

# Supporting Information

## Aspeverin, a New Alkaloid from an Algicolous Strain of *Aspergillus versicolor*

Nai-Yun Ji,\* Xiang-Hong Liu, Feng-Ping Miao, and Ming-Feng Qiao

*Key Laboratory of Coastal Biology and Bioresource Utilization, Yantai Institute of Coastal Zone Research, Chinese Academy of Sciences, Yantai 264003, China*

### List of Supporting Information

S2, Experimental Section;

S4,  $^1\text{H}$  NMR spectrum of compound **1** in  $\text{DMSO-}d_6$ ;

S5,  $^{13}\text{C}$  NMR and DEPT spectra of compound **1** in  $\text{DMSO-}d_6$ ;

S6, HSQC spectrum of compound **1** in  $\text{DMSO-}d_6$ ;

S7, HMBC spectrum of compound **1** in  $\text{DMSO-}d_6$ ;

S8,  $^1\text{H-}^1\text{H}$  COSY spectrum of compound **1** in  $\text{DMSO-}d_6$ ;

S9, NOESY spectrum of compound **1** in  $\text{DMSO-}d_6$ ;

S10,  $^1\text{H}$  NMR spectrum of compound **1** in  $\text{CDCl}_3$ ;

S11,  $^{13}\text{C}$  NMR and DEPT spectra of compound **1** in  $\text{CDCl}_3$ ;

S12, HSQC spectrum of compound **1** in  $\text{CDCl}_3$ ;

S13, HMBC spectrum of compound **1** in  $\text{CDCl}_3$ ;

S14,  $^1\text{H-}^1\text{H}$  COSY spectrum of compound **1** in  $\text{CDCl}_3$ ;

S15, NOESY spectrum of compound **1** in  $\text{CDCl}_3$ ;

S16, Positive ESIMS spectrum of compound **1**;

S17, Negative ESIMS spectrum of compound **1**;

S18, EIMS spectrum of compound **1**;

S19, HREIMS spectrum of compound **1**;

S20, IR spectrum of compound **1**;

S21, Cartesian coordinates of the energy-minimized conformer of compound **1** optimized at the gas-phase B3LYP/6-31G(d) level;

S22, Correlation between experimental and calculated  $^{13}\text{C}$  NMR data for the C-6 epimer of compound **1**.

## EXPERIMENTAL SECTION

**General Experimental Procedures.** The NMR spectra were recorded at 500 and 125 MHz for  $^1\text{H}$  and  $^{13}\text{C}$ , respectively, on a Bruker Avance III 500 NMR spectrometer using TMS as an internal standard. The low resolution  $\text{ESI}^+$  and  $\text{ESI}^-$  mass spectra were measured on an LCQ Fleet mass spectrometer. The low and high resolution EI mass spectra were determined on an Autospec Premier P776 mass spectrometer. The IR spectrum was obtained on a JASCO FT/IR-4100 spectrometer. The UV spectrum was measured on a TU-1810 spectrophotometer. The optical rotation was determined on a JASCO P-1020 polarimeter. The ECD spectrum was recorded on a Chirascan CD spectrometer. Quantum chemical calculations were operated using Gaussian 09 software (IA32W-G09RevC.01). Column chromatography was performed with silica gel (200-300 mesh, Qingdao Haiyang Chemical Co., Qingdao, China) and Sephadex LH-20 (Pharmacia). TLC was carried out with precoated silica gel plates (GF-254, Qingdao Haiyang Chemical Co., Qingdao, China). All solvents were of analytical grade.

**Fungal Material and Fermentation.** The fungal strain *A. versicolor* dl-29 was isolated from the fresh tissue of surface-sterilized marine green alga *Codium fragile* collected from the coast of Dalian, China in September, 2010. The fungus was identified by morphological observation and analysis of the ITS regions of its rDNA, whose sequence data have been deposited at GenBank with the accession number JX401544. The strain was preserved at the Yantai Institute of Coastal Zone Research, Chinese Academy of Sciences and China Center for Type Culture Collection (No. CCTCC M 2011421).

The initial cultures were maintained on the potato dextrose agar (PDA) plates. Pieces of mycelia were cut into small segments and aseptically inoculated into 50 Erlenmeyer flasks (1 L), each containing 300 mL potato dextrose broth (PDB) culture media. Static fermentations were performed at room temperature for 30 days.

**Extraction and Isolation.** The whole cultures (300mL  $\times$  50 flasks, 30 days) were filtered through cheesecloth to separate mycelia from broth. The broth was extracted with EtOAc to give an evaporated extract (9.2 g). The dried mycelia were homogenized and extracted with a mixture of  $\text{CHCl}_3$  and MeOH (1:1, v/v), and then the evaporated extract was partitioned between EtOAc and  $\text{H}_2\text{O}$  to yield an EtOAc-soluble extract (20.2 g). These two parts were combined for further separation based on their identical TLC profiles. The total EtOAc-soluble fraction (29.4 g) was subjected to step-gradient silica gel column chromatography (CC) with a solvent system consisting of 0–100% petroleum ether (PE)–EtOAc to afford 14 fractions (Frs. 1–14) based on TLC analysis. Fr.14 eluted with EtOAc and was further purified by CC on silica gel (PE/EtOAc, 2:1) and Sephadex LH-20 ( $\text{CHCl}_3$ /MeOH, 1:1) and preparative TLC ( $\text{CHCl}_3$ /EtOAc, 1:1) to yield compound **1** (8.6 mg).

*Aspeverin (1)*: colorless gum;  $[\alpha]_D^{23} +17.8$  ( $c$  0.18, MeOH); UV (MeOH)  $\lambda_{\max}$  ( $\log \epsilon$ ) 220 (4.53), 280 (3.56) nm; ECD (MeOH)  $\lambda_{\max}$  ( $\Delta\epsilon$ ) 221 (-17.0), 256 (8.4), 278 (-1.2), 300 (2.5) nm; IR (KBr)  $\nu_{\max}$  3236, 2970, 2939, 2873, 2233, 1712, 1581, 1369, 1088, 756  $\text{cm}^{-1}$ ;  $^1\text{H}$  and  $^{13}\text{C}$  NMR data, see Table 1; ESI<sup>+</sup>MS  $m/z$  377  $[\text{M} + \text{H}]^+$ ; ESI<sup>-</sup>MS  $m/z$  375  $[\text{M} - \text{H}]^-$ ; EIMS  $m/z$  (%) 376 (100), 332 (34), 317 (24), 290 (20), 248 (50), 209 (38), 195 (30), 170 (25), 109 (48), 83 (98); HREIMS  $m/z$  376.1857  $[\text{M}]^+$  (calcd for  $\text{C}_{22}\text{H}_{24}\text{N}_4\text{O}_2$ , 376.1899).

**Computational Details.** A conformational search for **1** was performed via the Dreiding force field in MarvinSketch<sup>12</sup> (optimization limit = normal, diversity limit = 0.1) to give eight conformers, the geometries of which were further optimized at the gas-phase B3LYP/6-31G(d) level via Gaussian 09 software<sup>13</sup> to afford just one conformer within 3 kcal/mol energy threshold from the global minimum without vibrational imaginary frequencies. Then, this predominant conformer was subjected to the theoretical calculations of  $^{13}\text{C}$  NMR (GIAO method) and ECD (TD-DFT method) spectra at the gas-phase B3LYP/6-31G(d) level. The calculated ECD spectrum was drawn via SpecDic software<sup>17</sup> with sigma = 0.2 and UV shift = 0 nm.

**Bioassays and Results.** The inhibitory activities against marine zooplankton (*Artemia salina*) and phytoplankton (*Heterosigma akashiwo*) as well as four bacteria (*Vibrio ichthyenteri*, *Proteus mirabilis*, *Enterobacter cloacae*, and *Bacillus cereus*, at 30  $\mu\text{g}/\text{disk}$ ) isolated from seawater were assayed as described previously,<sup>18,19</sup> with positive controls of  $\text{K}_2\text{Cr}_2\text{O}_7$  and chloramphenicol, respectively. The results were shown in Table S1.

**Table S1.** Bioassay Results of Compound **1**

|                                                                        | <b>1</b> | $\text{K}_2\text{Cr}_2\text{O}_7$ | chloramphenicol |
|------------------------------------------------------------------------|----------|-----------------------------------|-----------------|
| <i>A. salina</i> (lethal rate at 100 $\mu\text{g}/\text{mL}$ ; 24h)    | 27.5%    | 100%                              |                 |
| <i>H. akashiwo</i> ( $\text{EC}_{50}$ , $\mu\text{g}/\text{mL}$ ; 24h) | 6.3      | 13.5                              |                 |
| <i>H. akashiwo</i> ( $\text{EC}_{50}$ , $\mu\text{g}/\text{mL}$ ; 96h) | 3.4      | 5.1                               |                 |
| <i>V. ichthyenteri</i> (inhibitory diameter, mm; 24h)                  | 0        |                                   | 28              |
| <i>P. mirabilis</i> (inhibitory diameter, mm; 24h)                     | 7.0      |                                   | 26              |
| <i>E. cloacae</i> (inhibitory diameter, mm; 24h)                       | 6.5      |                                   | 22              |
| <i>B. cereus</i> (inhibitory diameter, mm; 24h)                        | 6.0      |                                   | 20              |

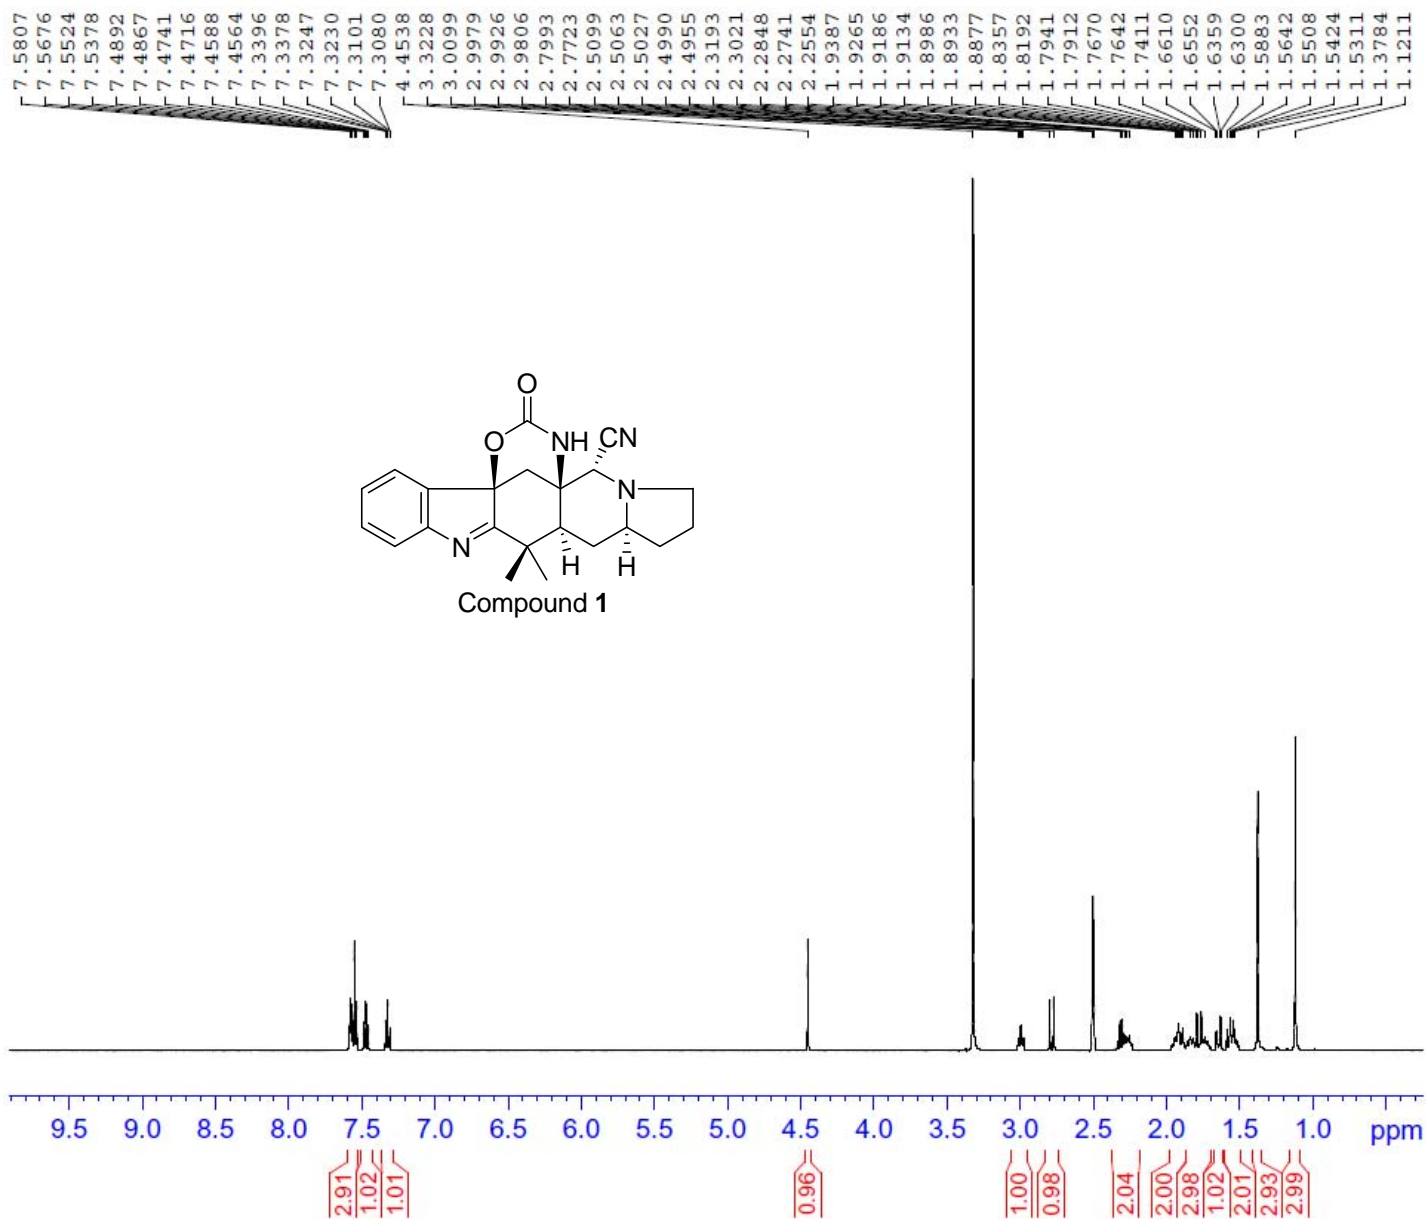

```

NAME          120413
EXPNO         2
PROCNO        1
Date_         20120414
Time          1.05
INSTRUM       spect
PROBHD        5 mm PABBO BB-
PULPROG       zg30
TD            65536
SOLVENT       DMSO
NS            8
DS            0
SWH           10330.578 Hz
FIDRES        0.157632 Hz
AQ            3.1719923 sec
RG            203
DW            48.400 usec
DE            6.50 usec
TE            298.0 K
D1            1.00000000 sec
TD0           1

===== CHANNEL f1 =====
NUC1          1H
P1            10.05 usec
SI            65536
SF            500.1300040 MHz
WDW           EM
SSB           0
LB            0.30 Hz
GB            0
PC            1.00

```

<sup>13</sup>C

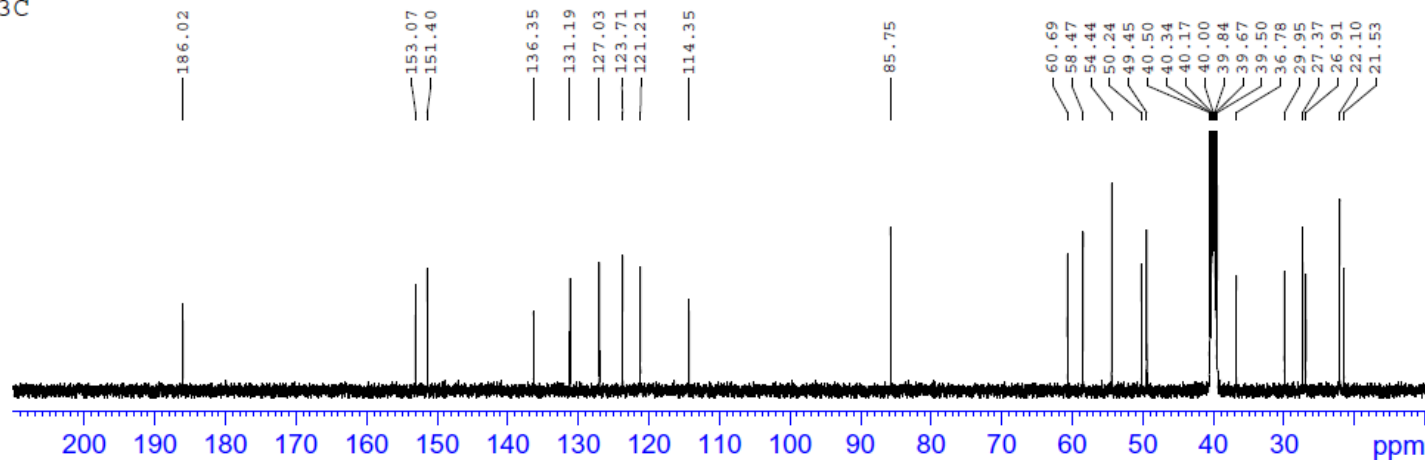

```

NAME      120416
EXPNO     1
PROCNO    1
Date_     20120417
Time      2.10
INSTRUM    spect
PROBHD     5 mm PABBO BB-
PULPROG    zgpg30
TD         65536
SOLVENT    DMSO
NS         1024
DS         4
SWH         29761.904 Hz
FIDRES     0.454131 Hz
AQ         1.1010548 sec
RG         203
DM         16.800 usec
DE         6.50 usec
TE         298.3 K
D1         2.00000000 sec
D11        0.03000000 sec
TD0        1

===== CHANNEL f1 =====
NUC1       13C
P1         9.60 usec
S1         32768
SF         125.7577890 MHz
WOW        RM
GB         0
LB         1.00 Hz
CB         0
PC         1.40
  
```

dept90

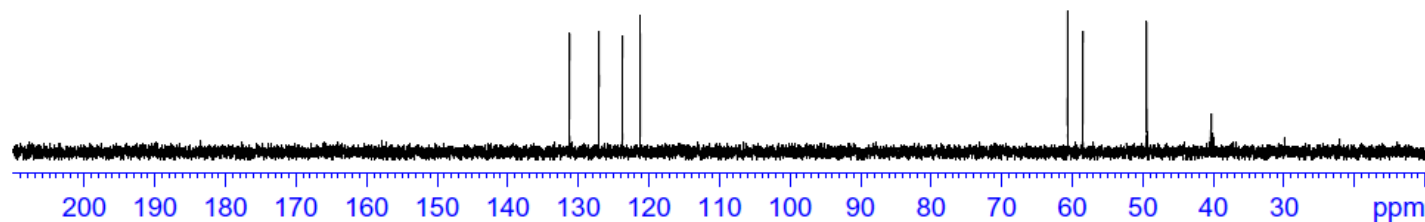

```

NAME      120416
EXPNO     3
PROCNO    1
Date_     20120417
Time      3.26
INSTRUM    spect
PROBHD     5 mm PABBO BB-
PULPROG    zgpg90
TD         65536
SOLVENT    DMSO
NS         128
DS         4
SWH         29761.904 Hz
FIDRES     0.454131 Hz
AQ         1.1010548 sec
RG         203
DM         16.800 usec
DE         6.50 usec
TE         298.0 K
D1         145.00000000 sec
D11        0.00344828 sec
D12        0.00002000 sec
TD0        1

===== CHANNEL f1 =====
NUC1       13C
P1         9.60 usec
P2         19.20 usec
S1         32768
SF         125.7577890 MHz
WOW        RM
GB         0
LB         1.00 Hz
CB         0
PC         1.40
  
```

dept135

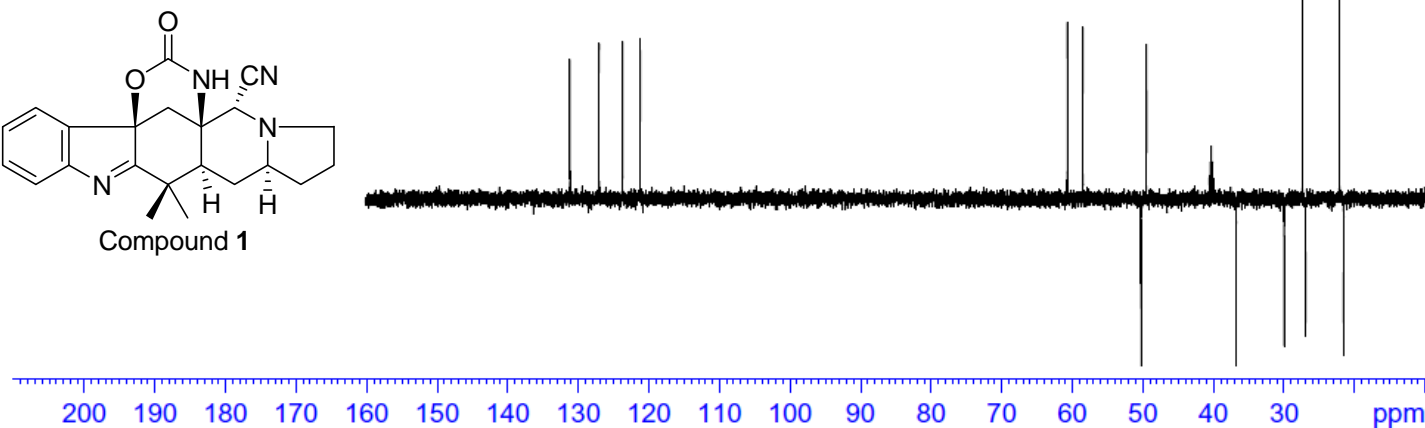

```

NAME      120416
EXPNO     2
PROCNO    1
Date_     20120417
Time      3.10
INSTRUM    spect
PROBHD     5 mm PABBO BB-
PULPROG    zgpg135
TD         65536
SOLVENT    DMSO
NS         256
DS         4
SWH         29761.291 Hz
FIDRES     0.307637 Hz
AQ         1.6253428 sec
RG         203
DM         24.800 usec
DE         6.50 usec
TE         298.0 K
D1         145.00000000 sec
D11        2.00000000 sec
D12        0.00344828 sec
D12        0.00002000 sec
TD0        1

===== CHANNEL f1 =====
NUC1       13C
P1         9.60 usec
P13        2000.00 usec
S1         32768
SF         125.7577890 MHz
WOW        RM
GB         0
LB         1.00 Hz
CB         0
PC         1.40
  
```

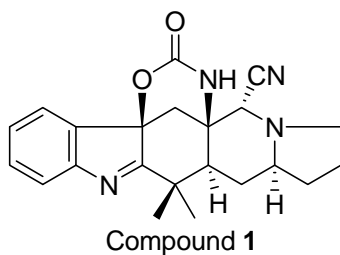

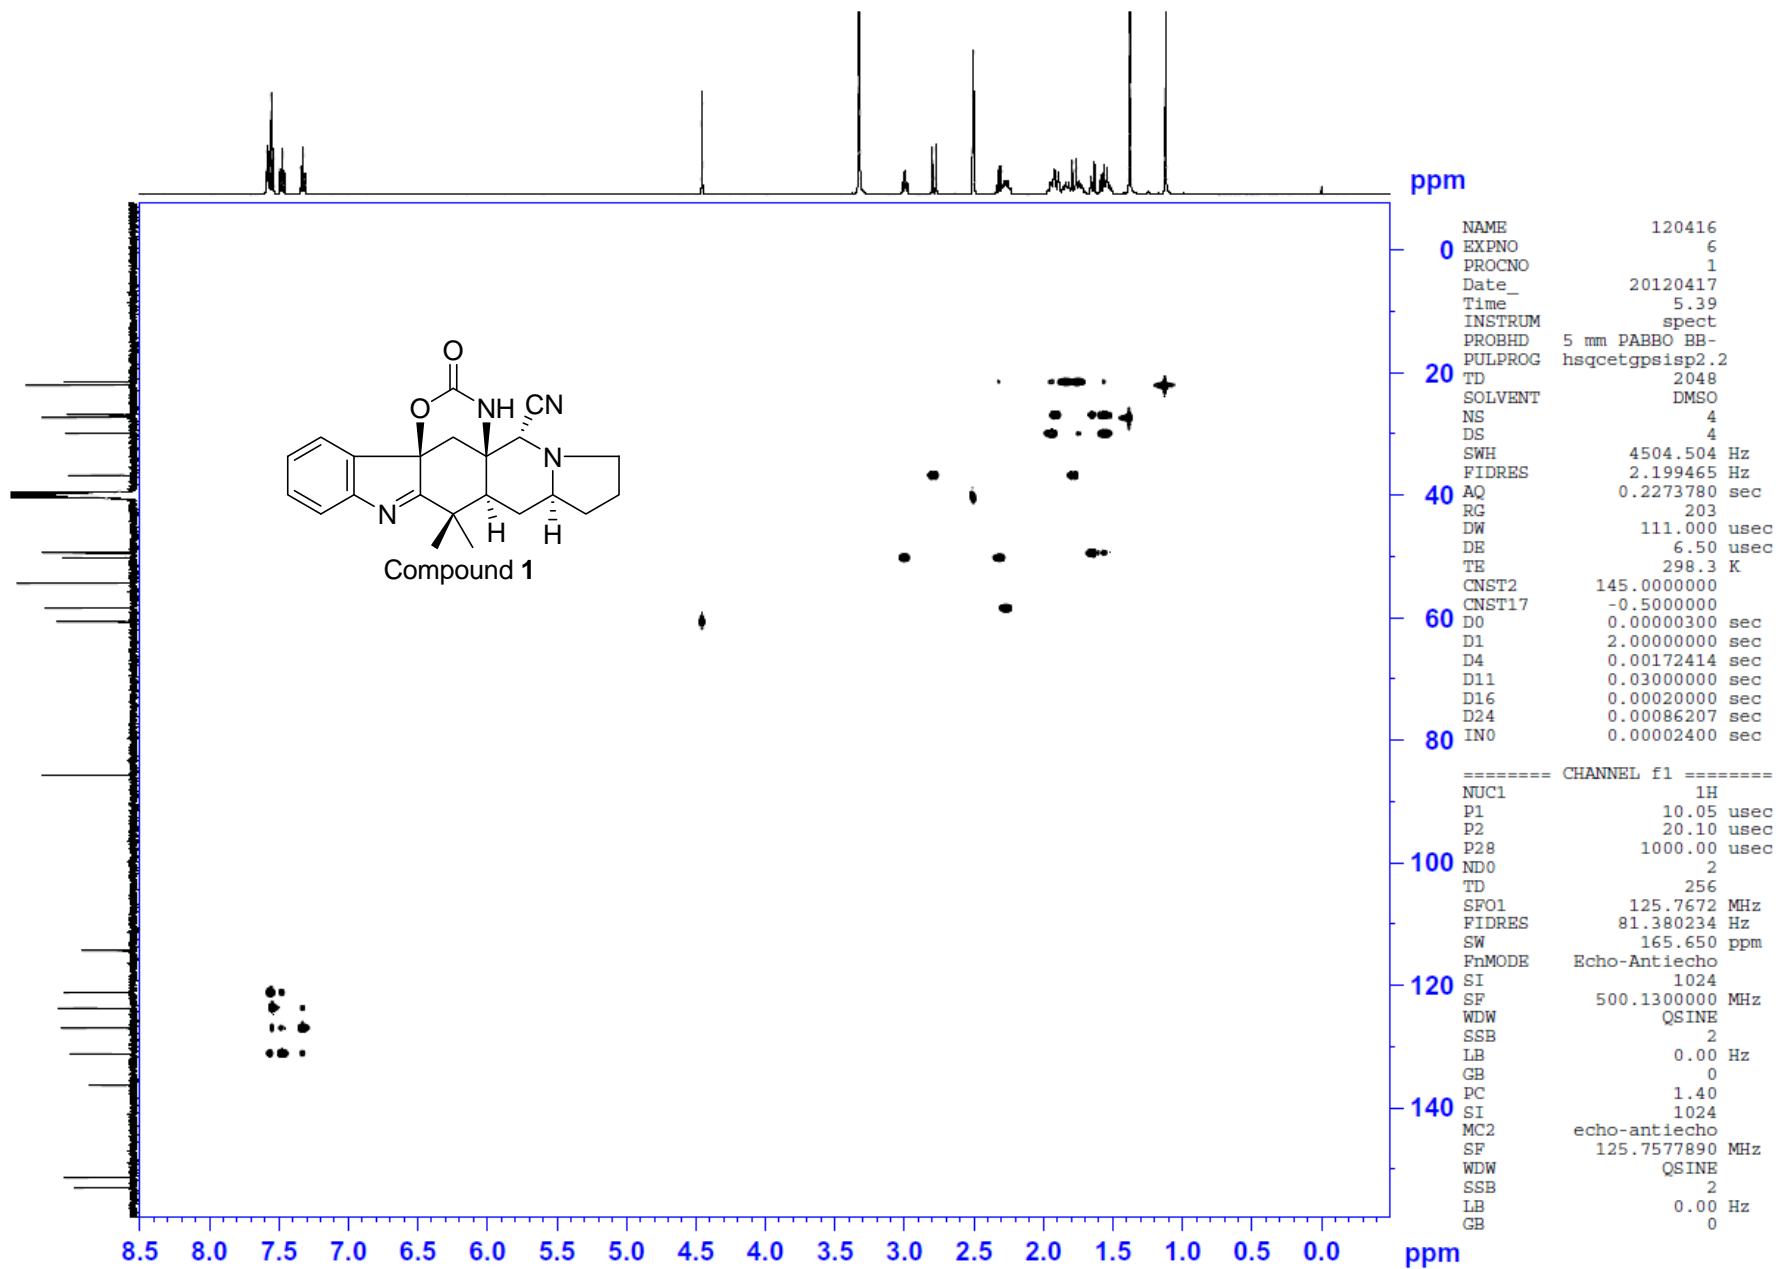

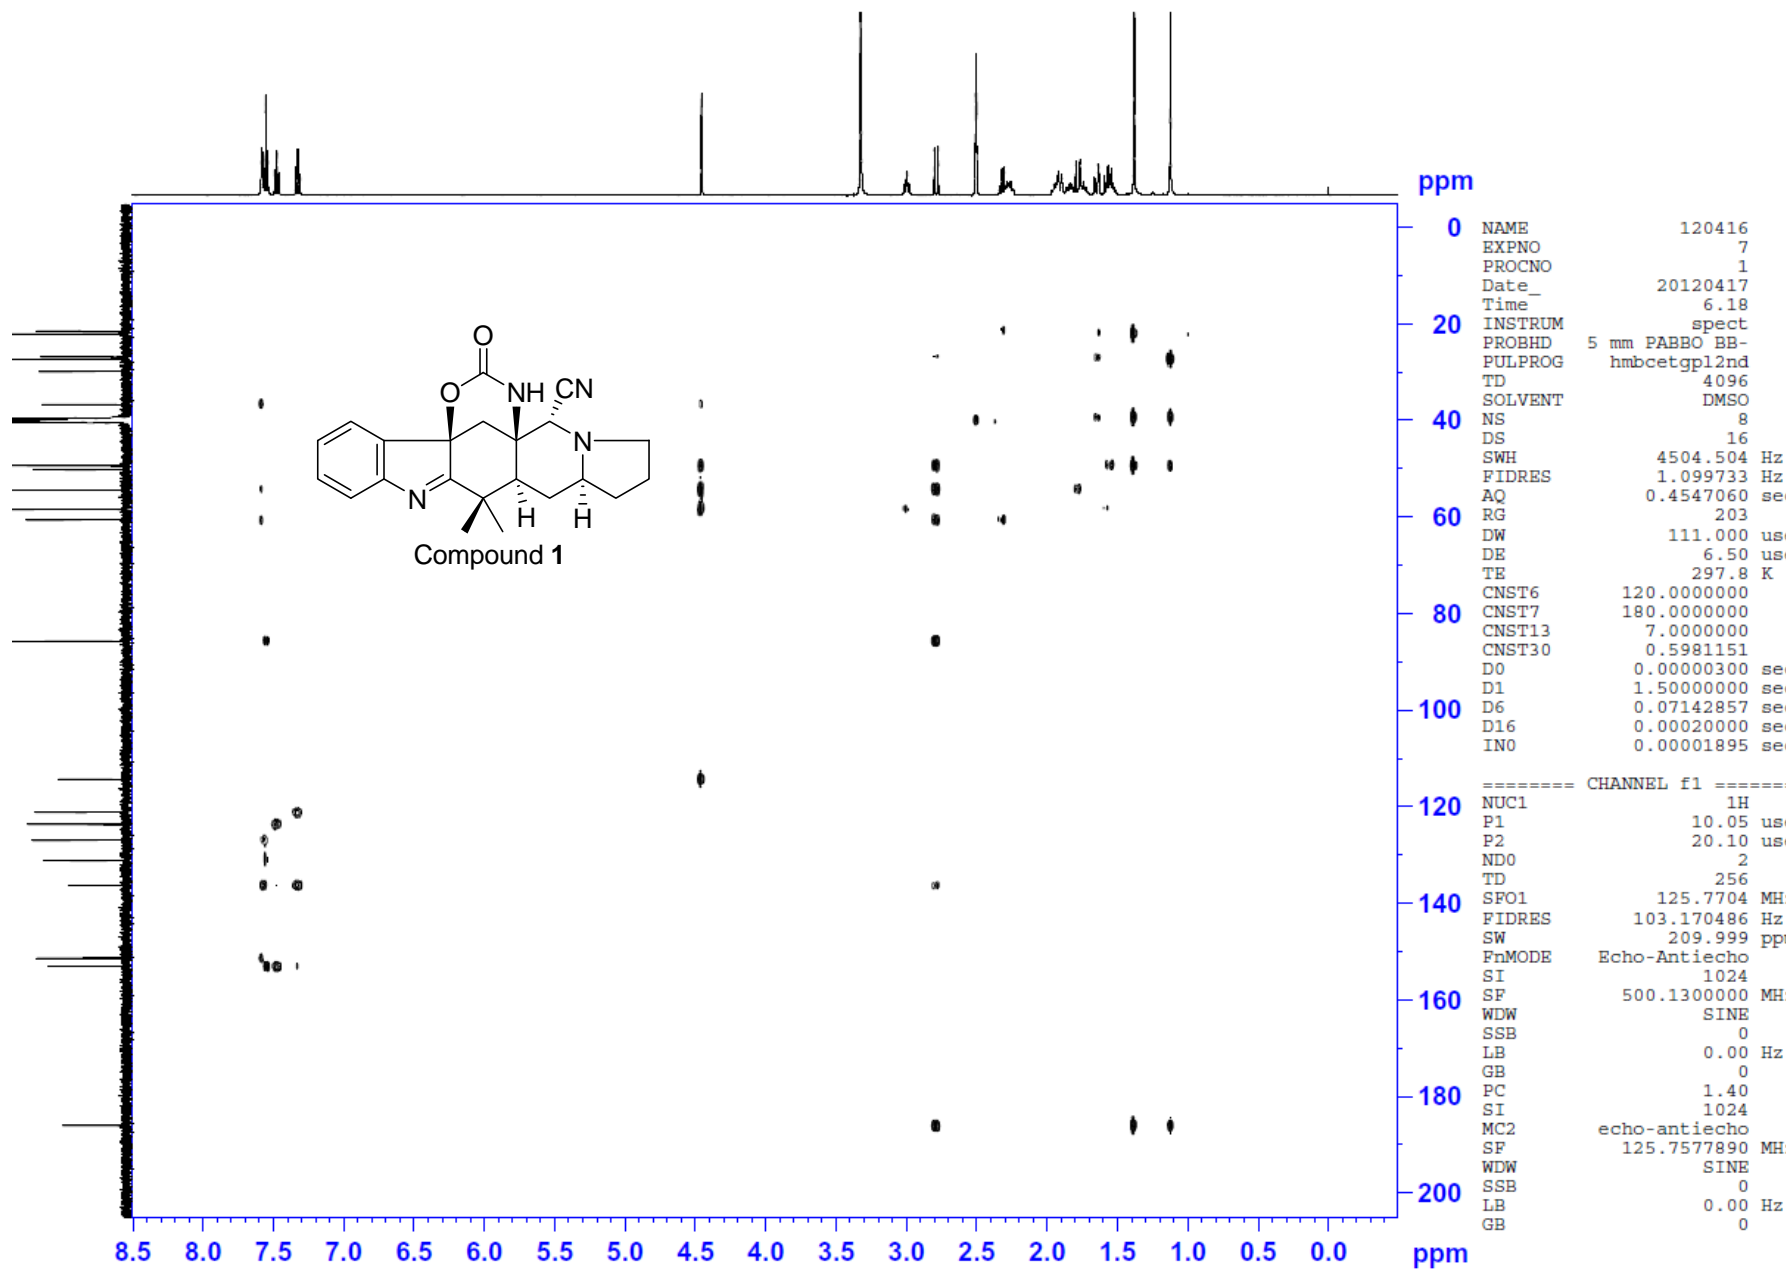

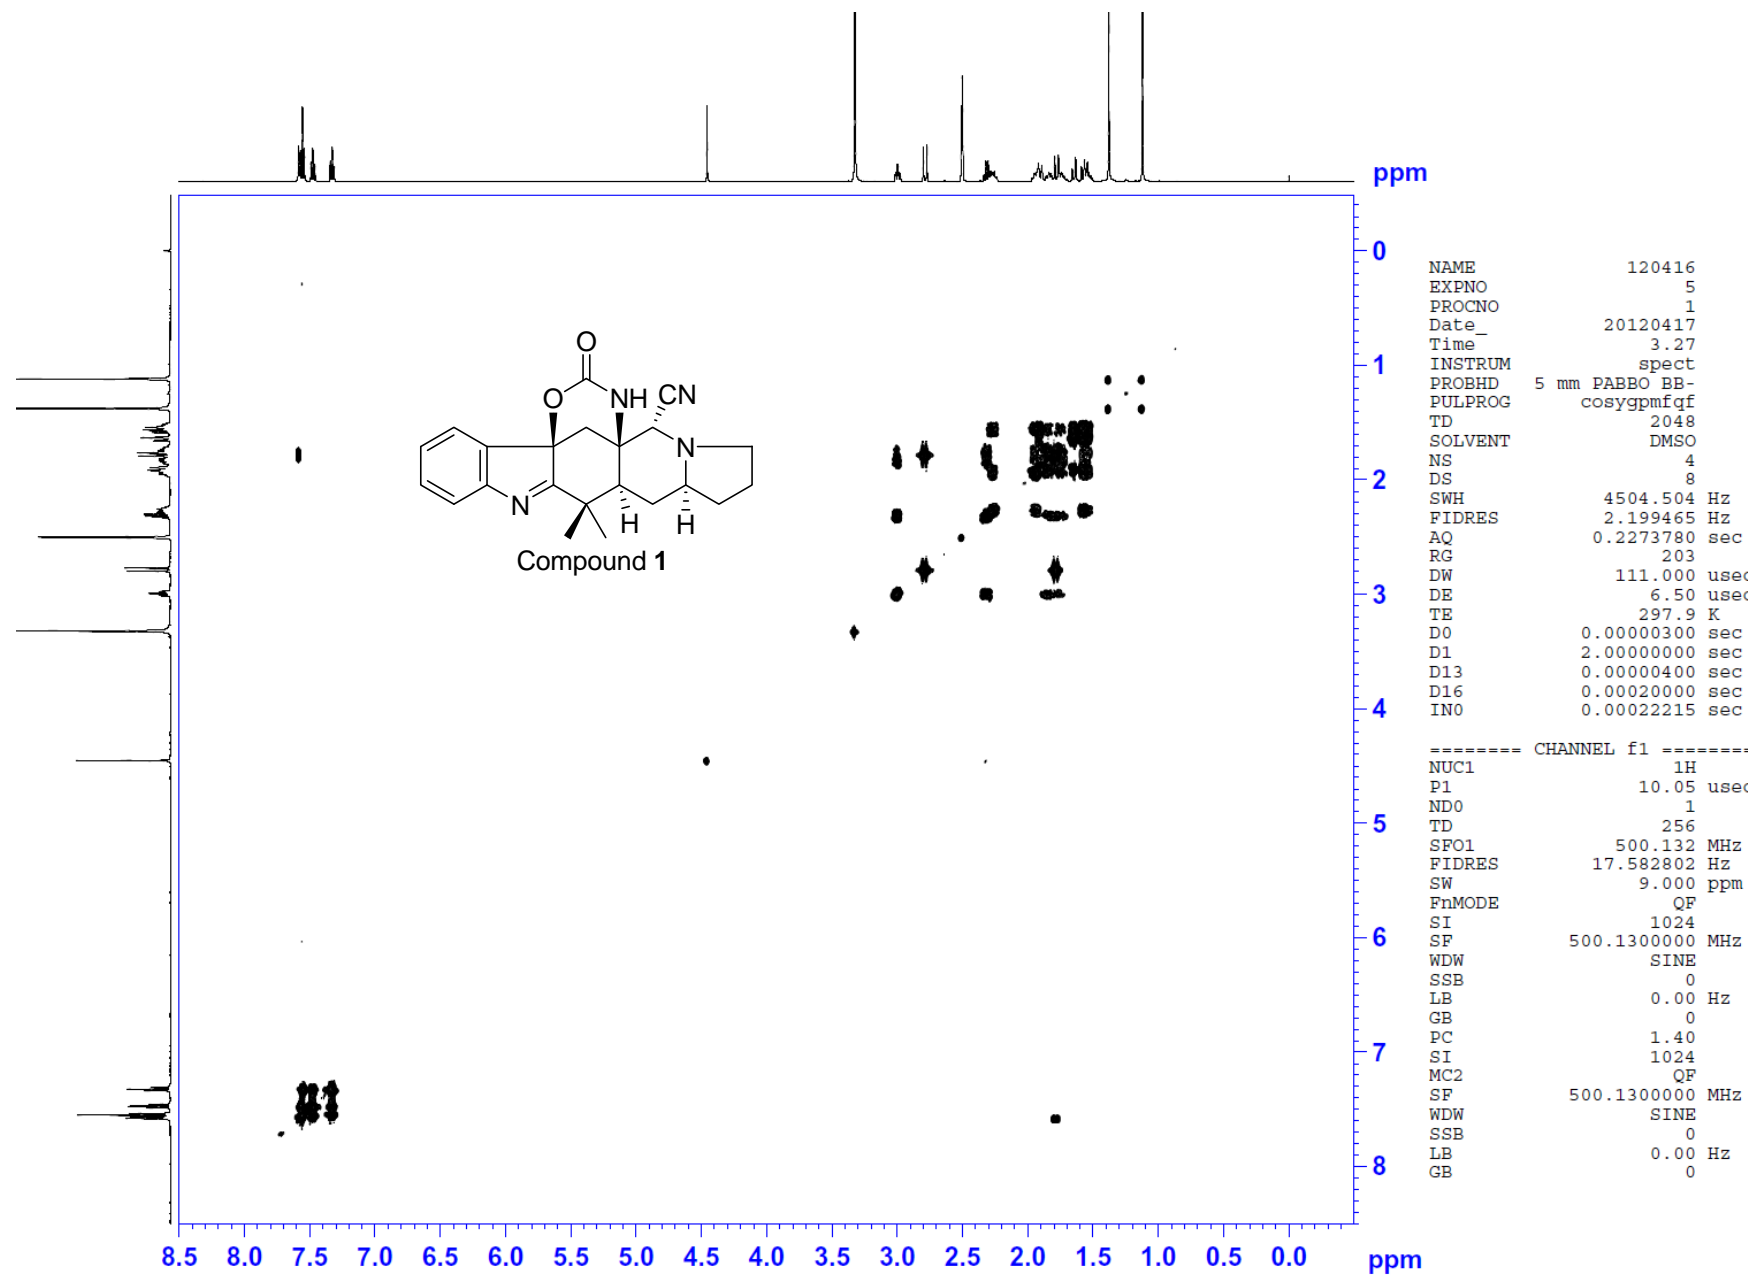



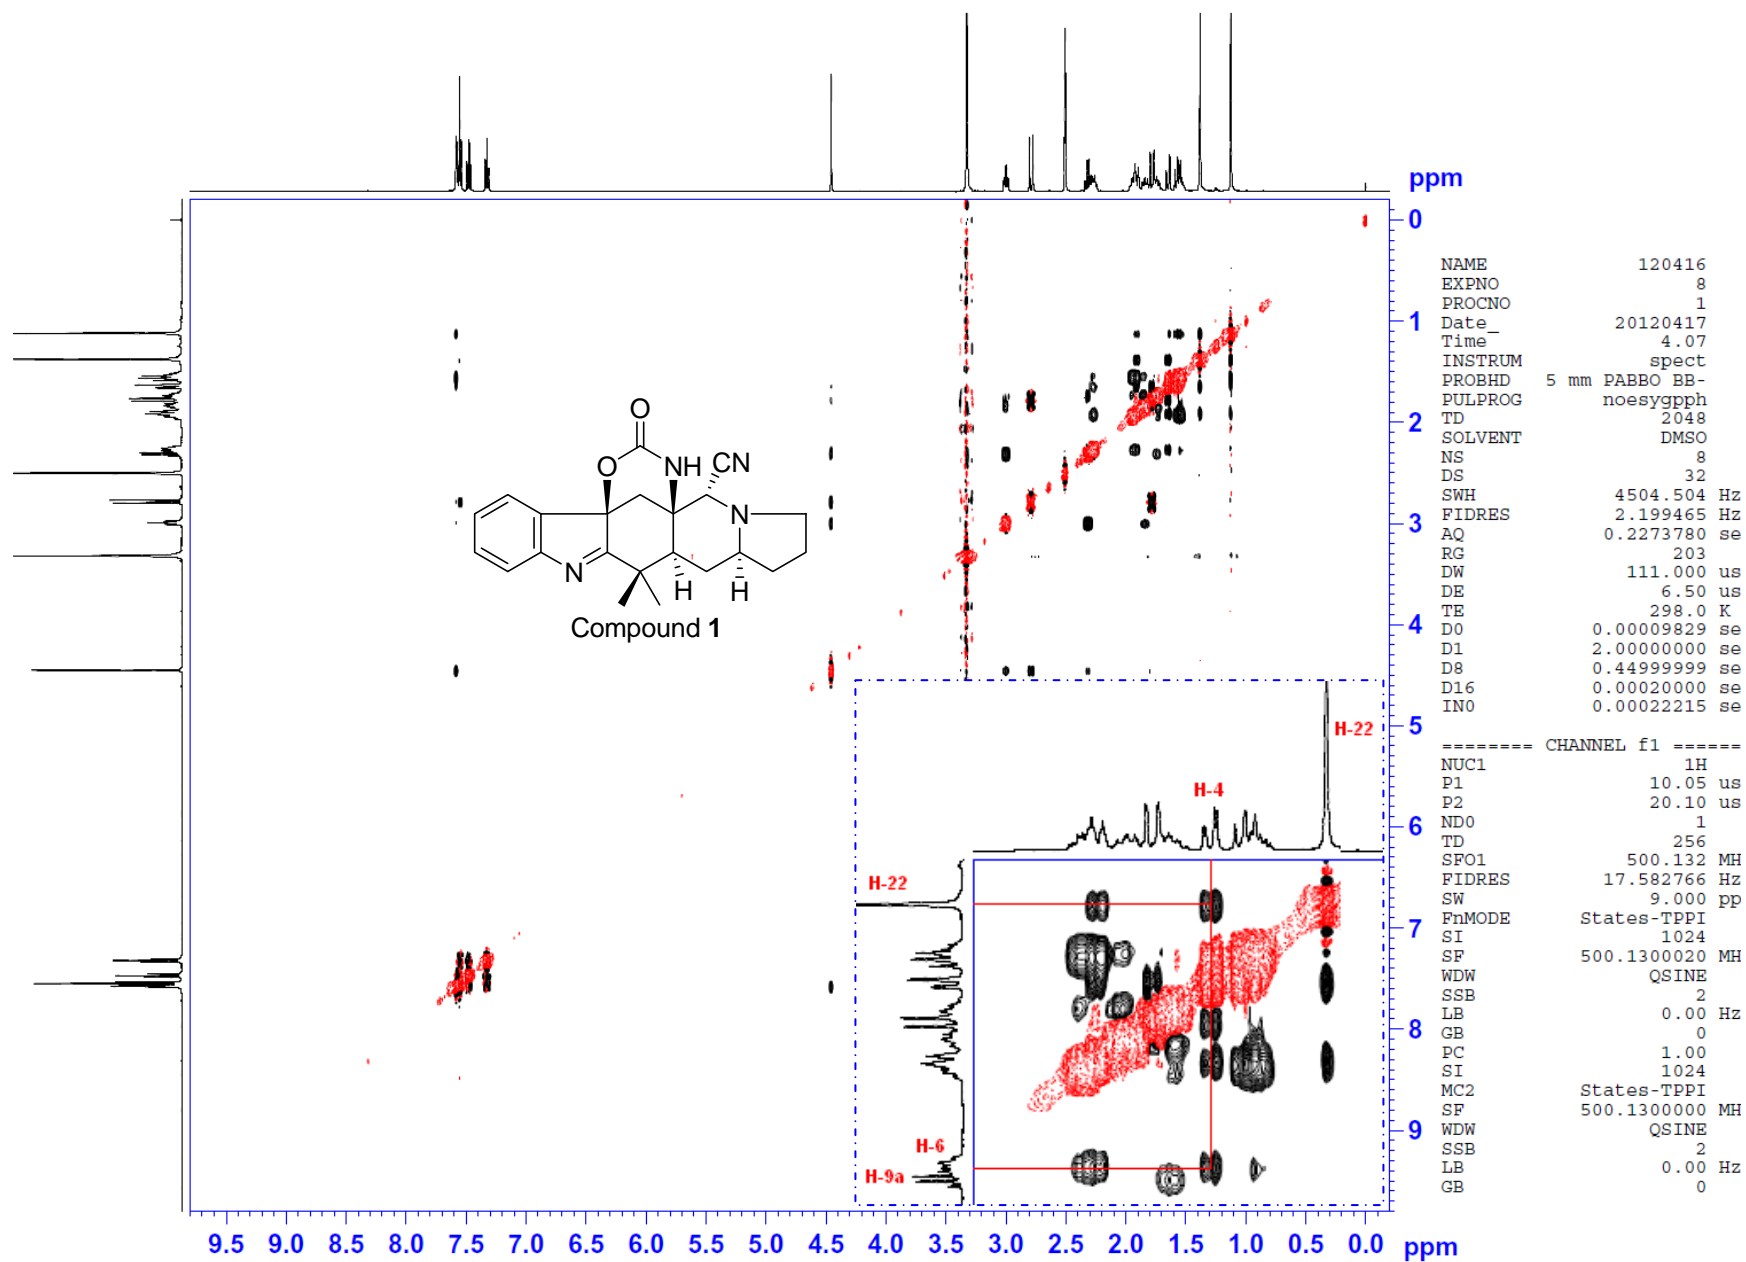

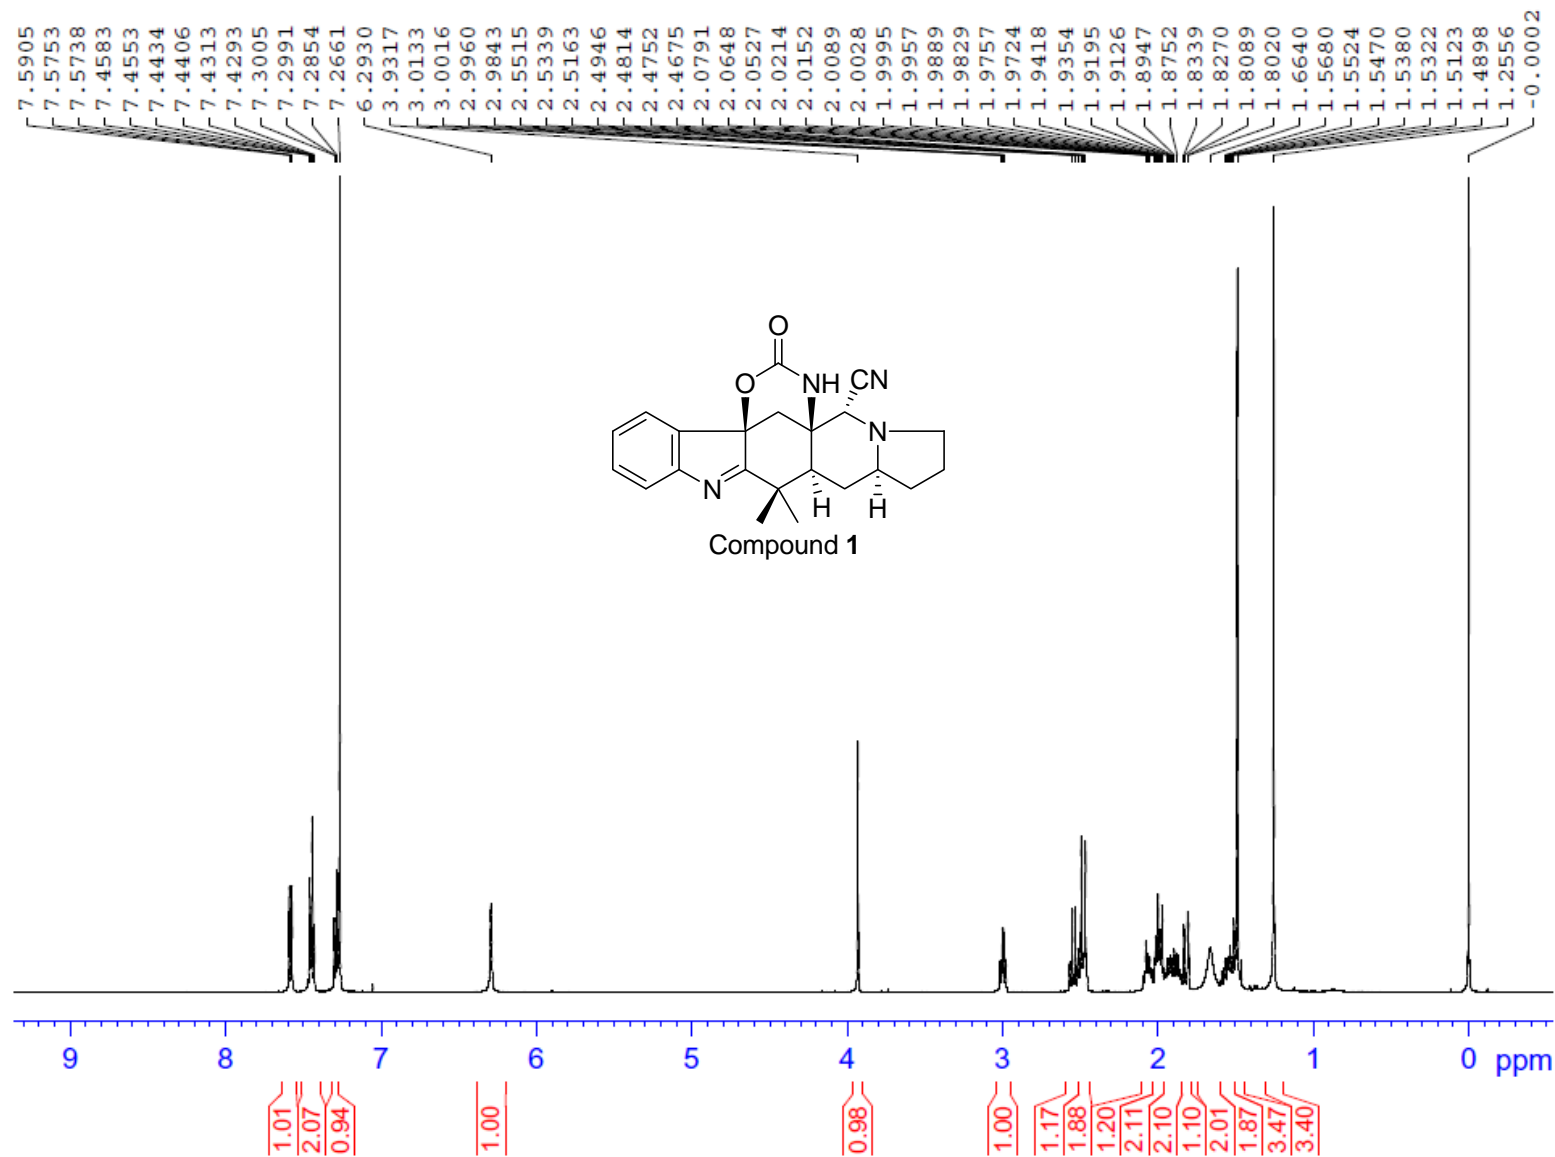

```

NAME                110808
EXPNO                1
PROCNO              1
Date_               20110808
Time_               9.27
INSTRUM             spect
PROBHD              5 mm PABBO BB-
PULPROG             zg30
TD                  65536
SOLVENT             CDCl3
NS                   8
DS                   0
SWH                 10330.578 Hz
FIDRES              0.157632 Hz
AQ                  3.1719923 sec
RG                   128
DW                   48.400 usec
DE                   6.50 usec
TE                   293.7 K
D1                   1.00000000 sec
TD0                  1

===== CHANNEL f1 =====
NUC1                 1H
P1                   12.40 usec
PL1                  0.35 dB
PL1W                 19.76737595 W
SFO1                 500.1330885 MHz
SI                   32768
SF                   500.1300105 MHz
WDW                  EM
SSB                   0
LB                   0.30 Hz
GB                   0
PC                   1.00

```

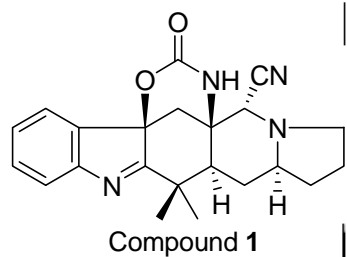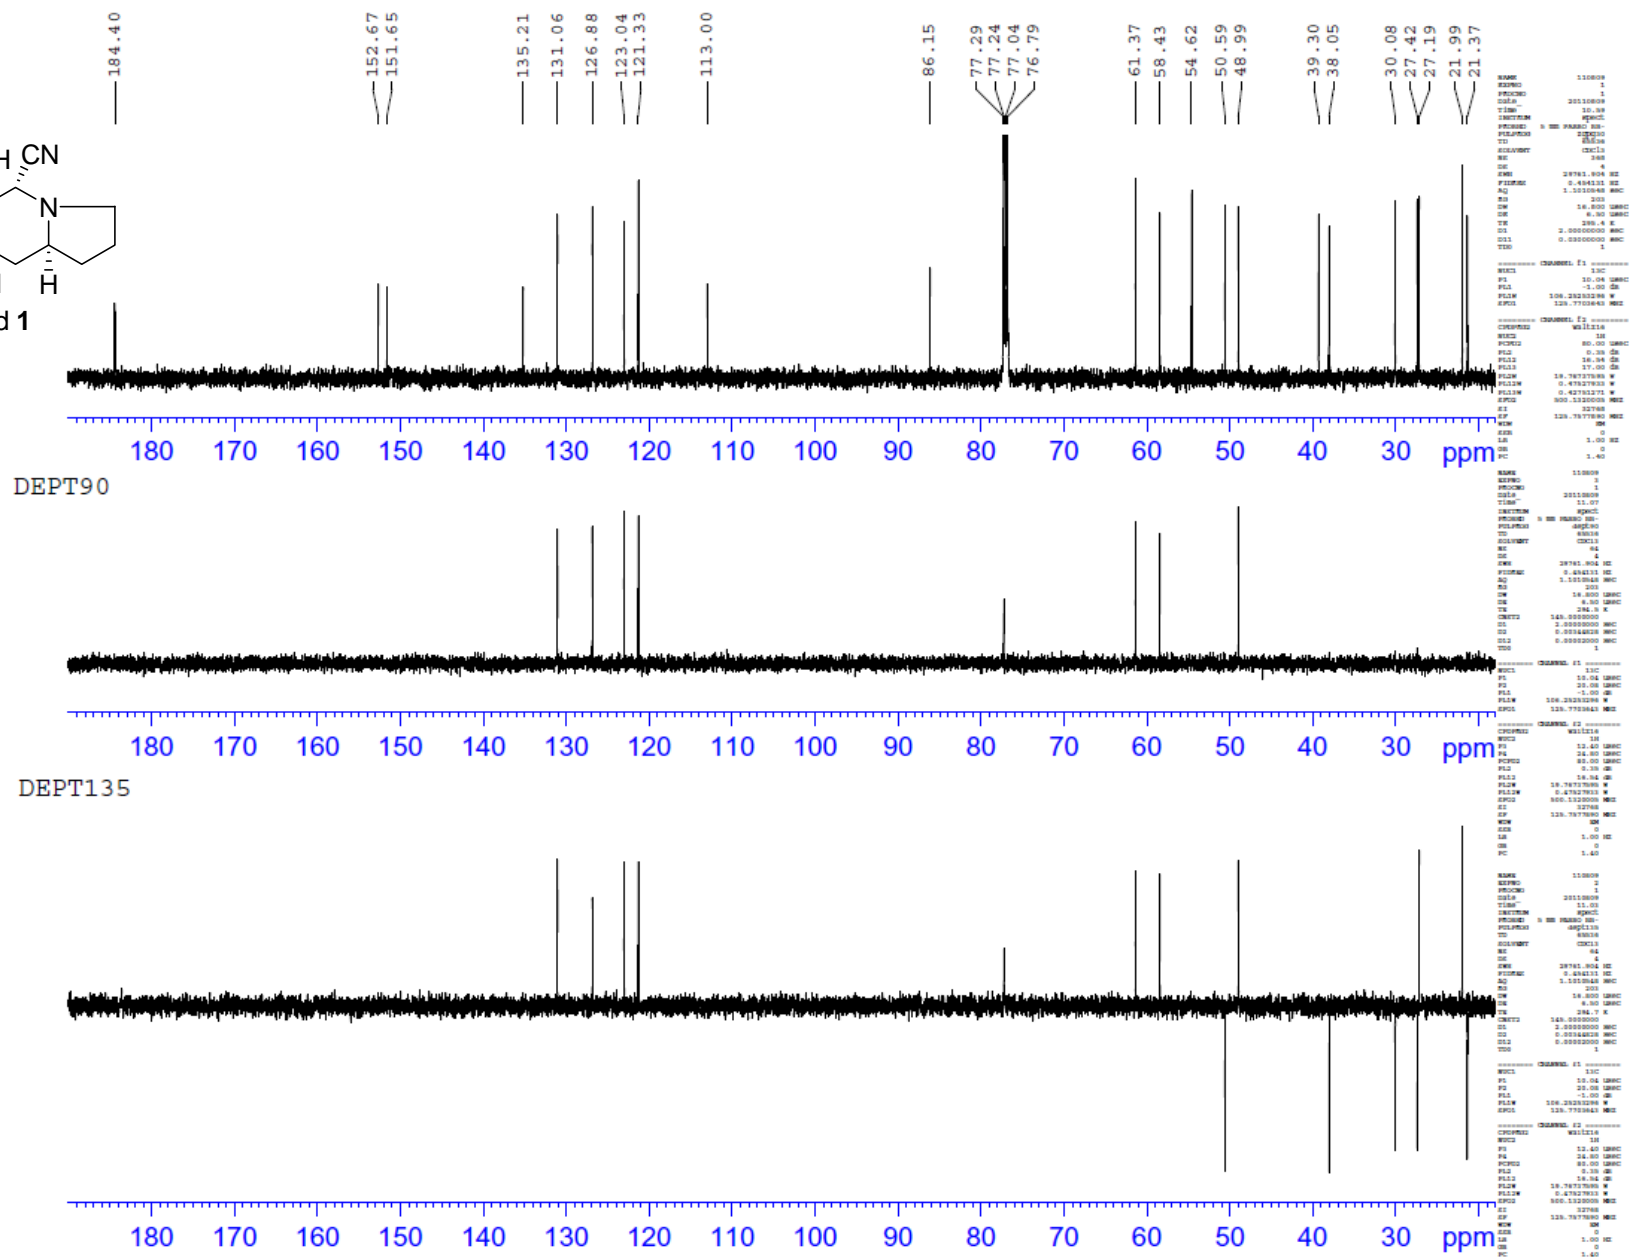

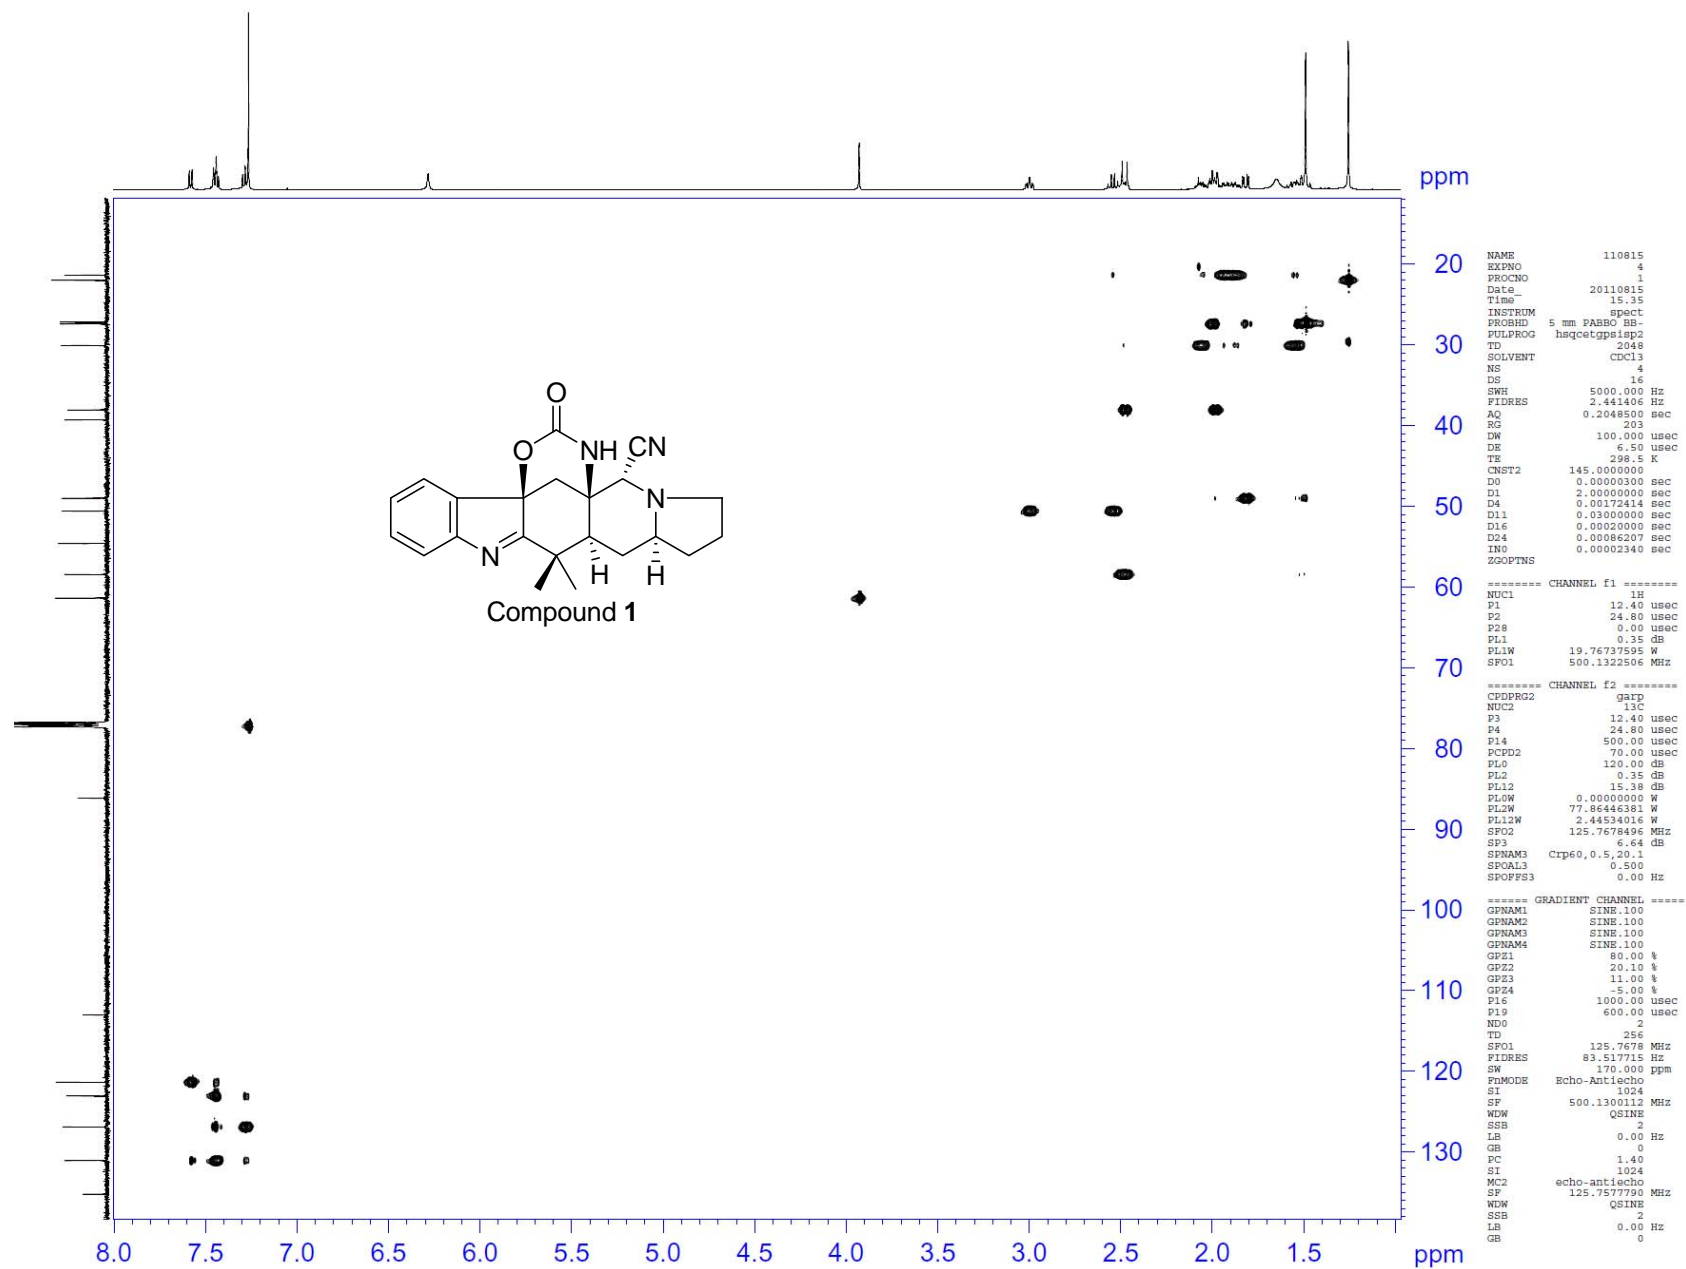

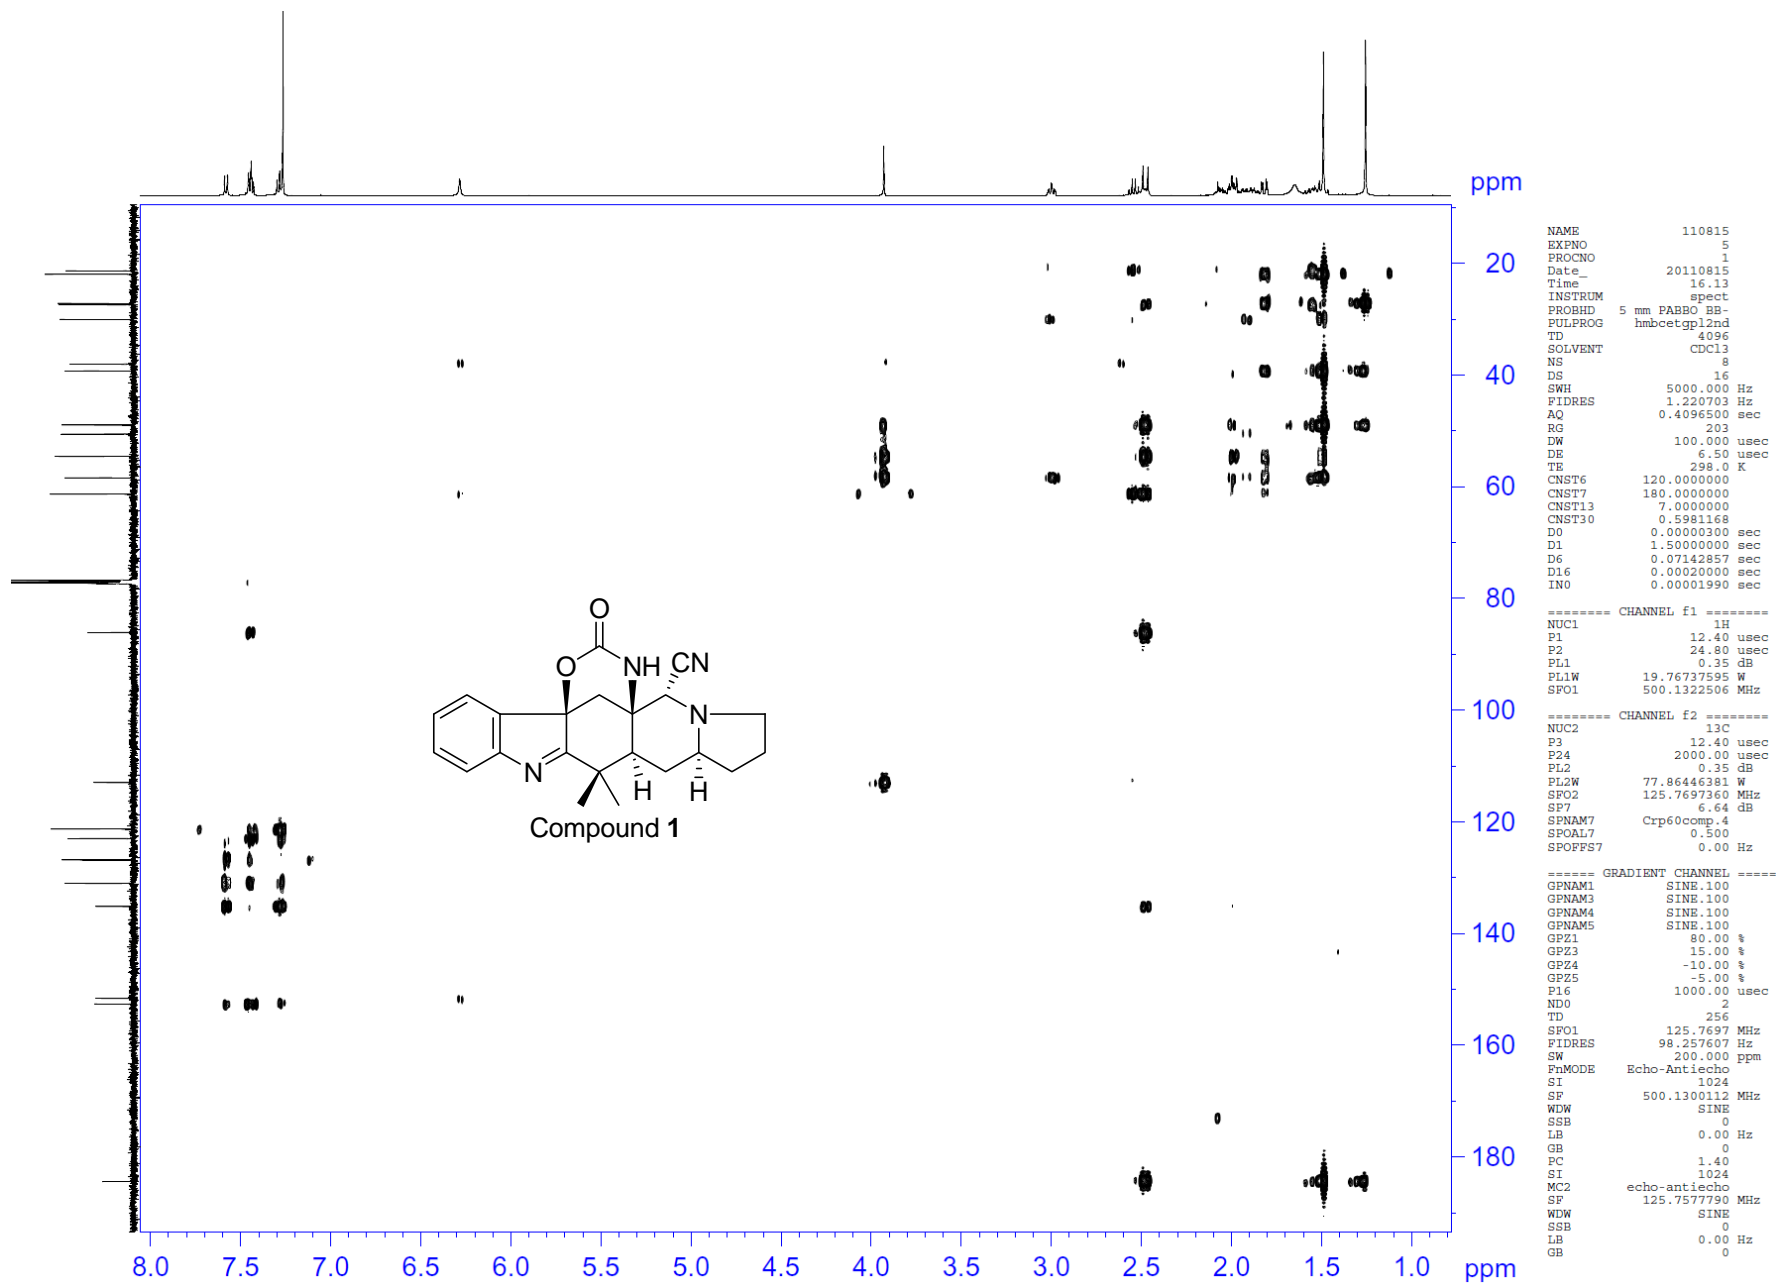

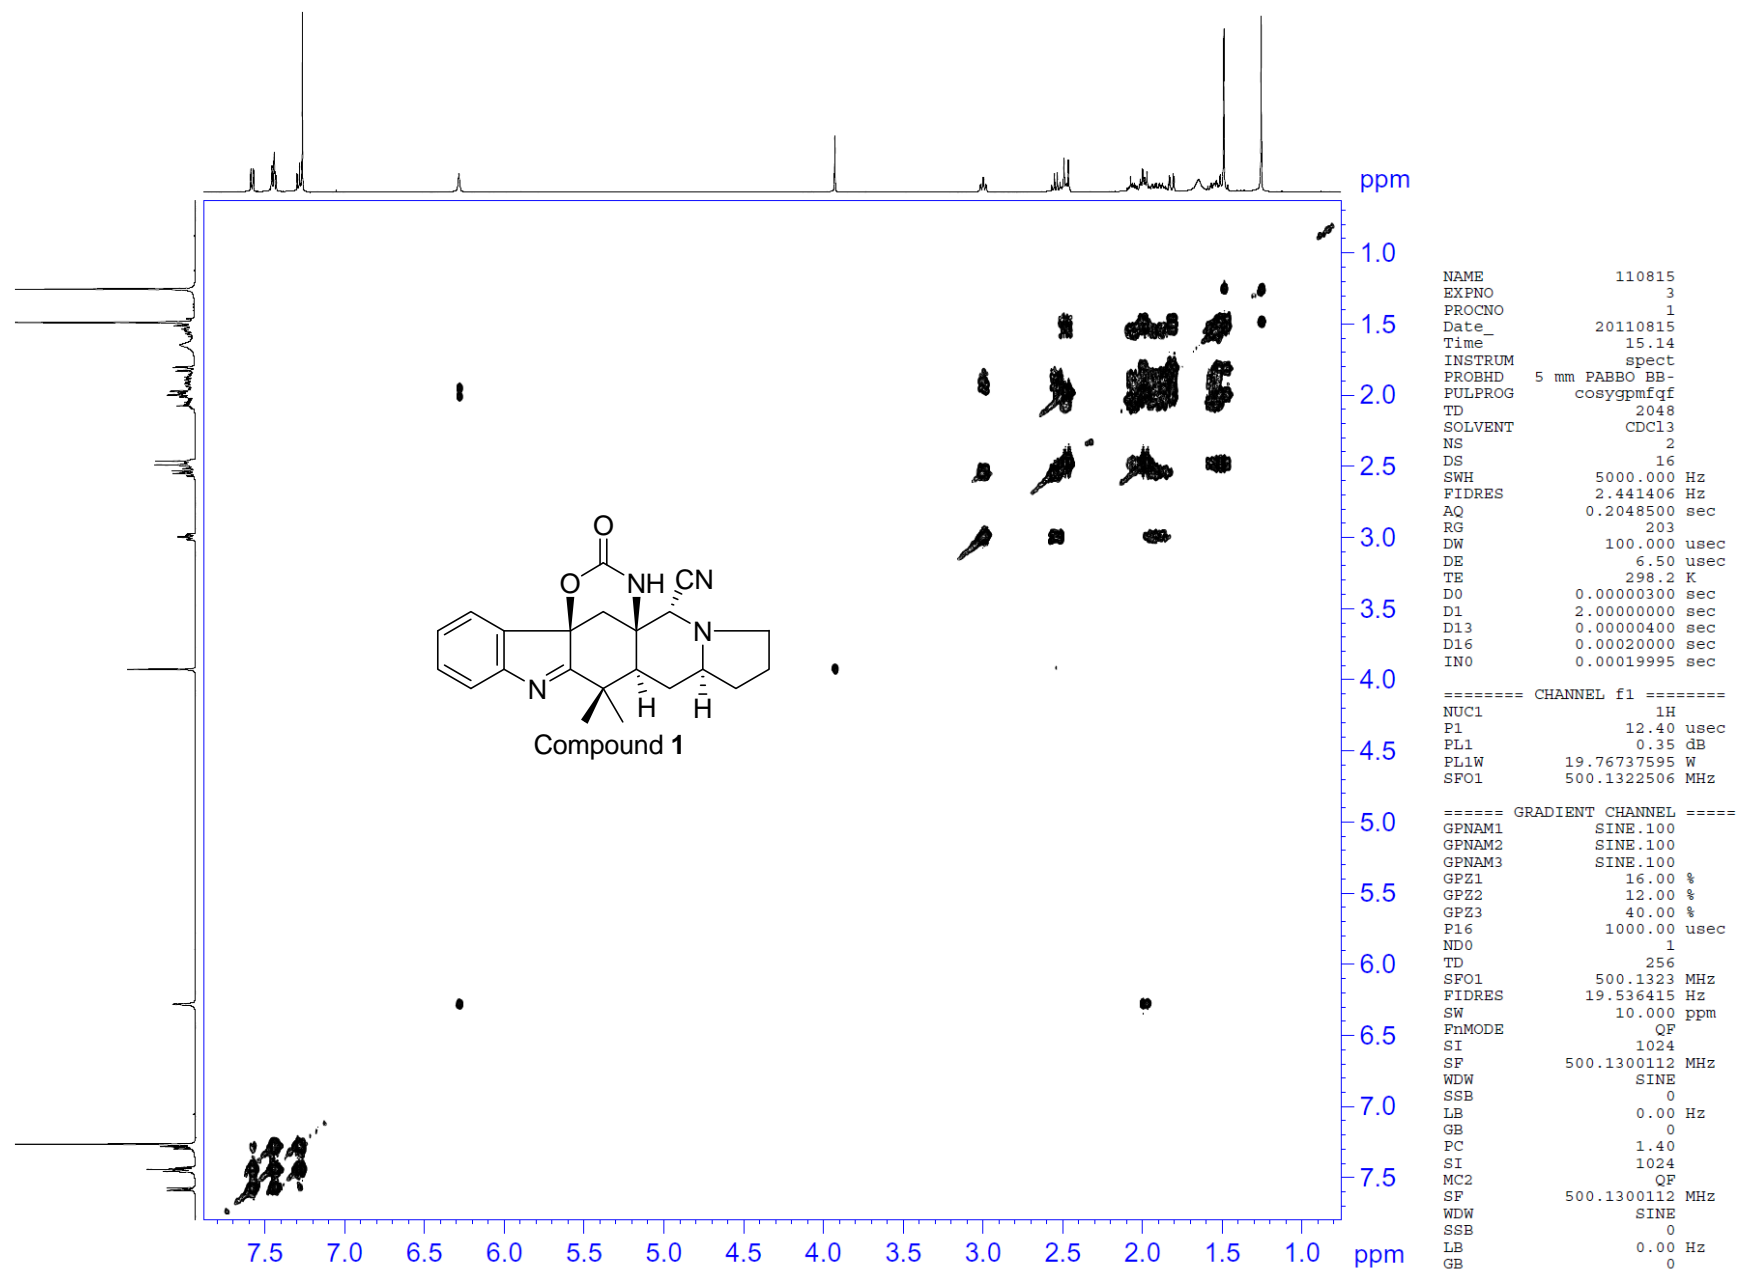

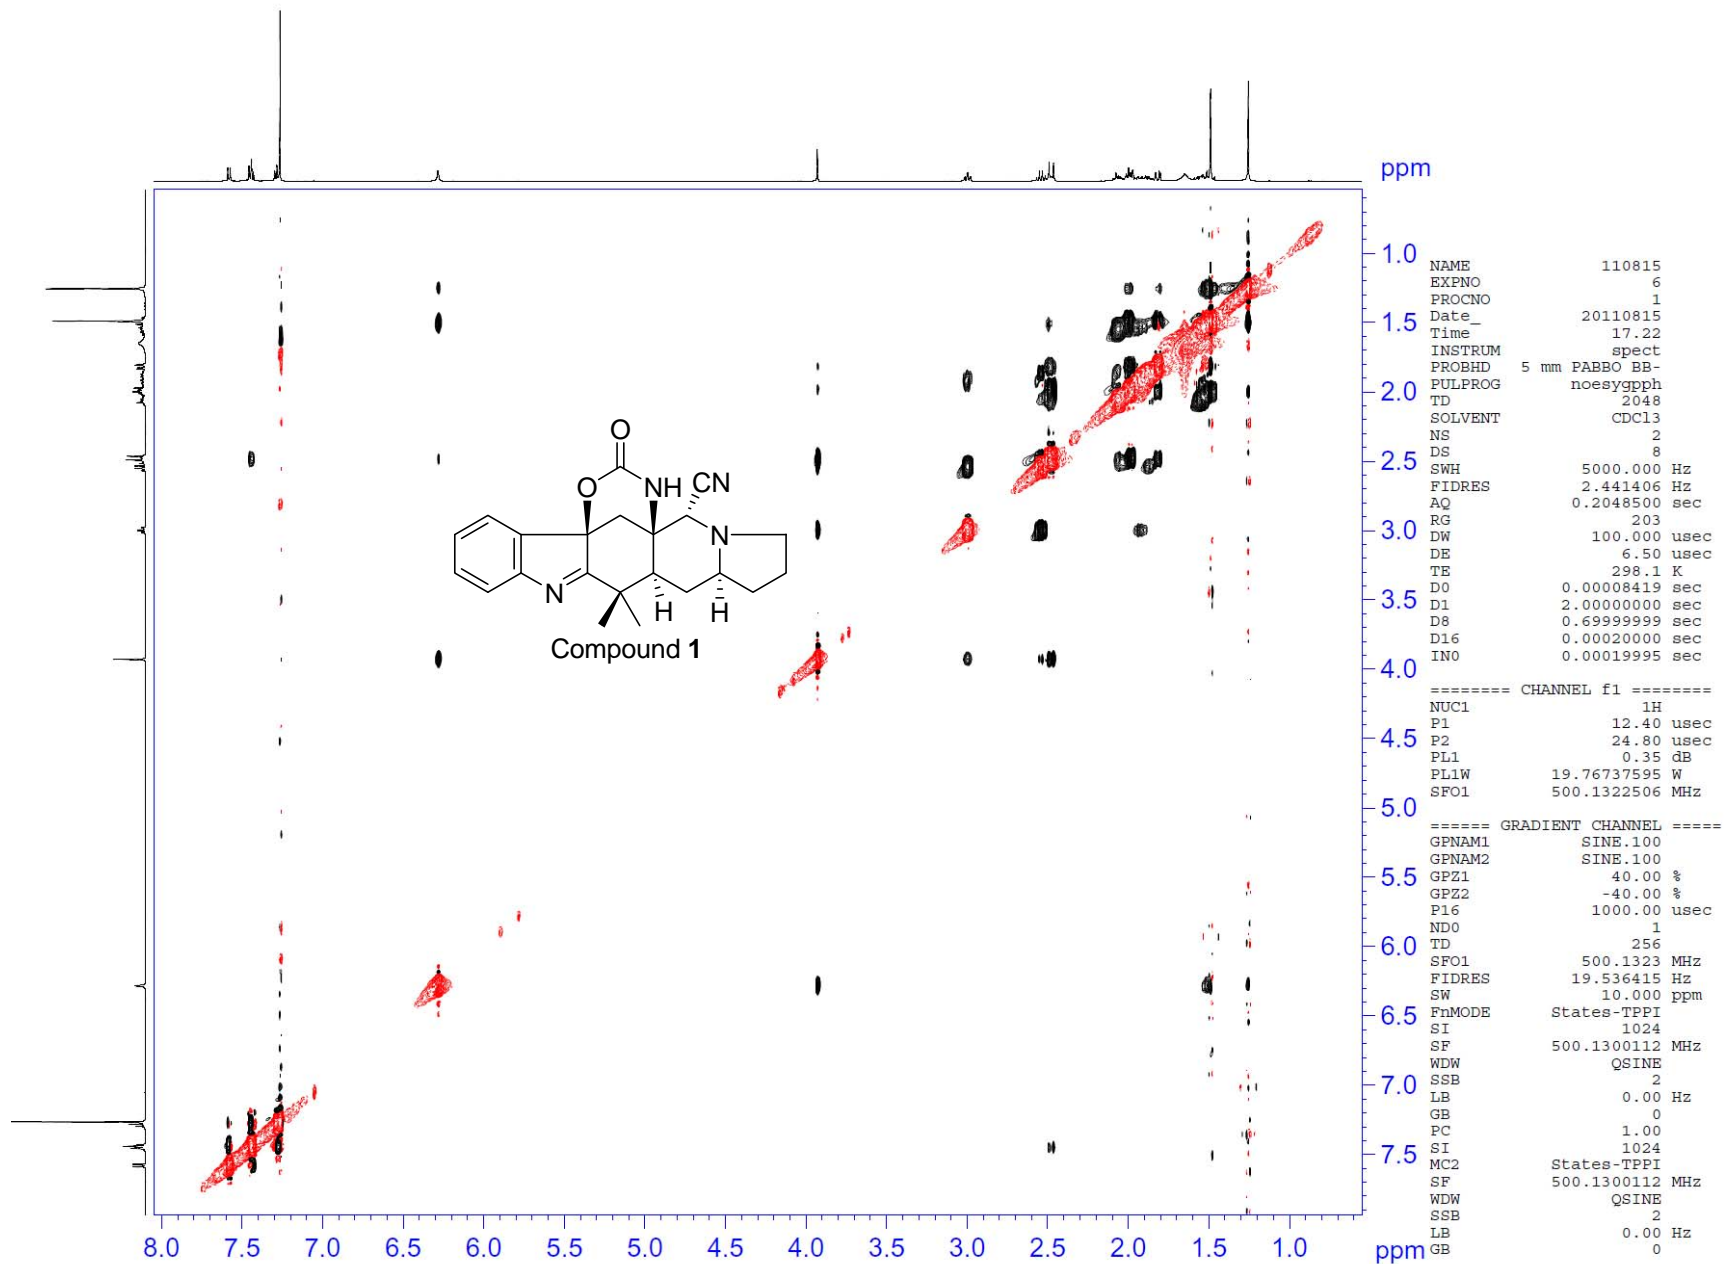

DL29-5 #1357 RT: 24.19 AV: 1 NL: 2.74E5  
F: ITMS + c ESI Full ms [50.00-2000.00]

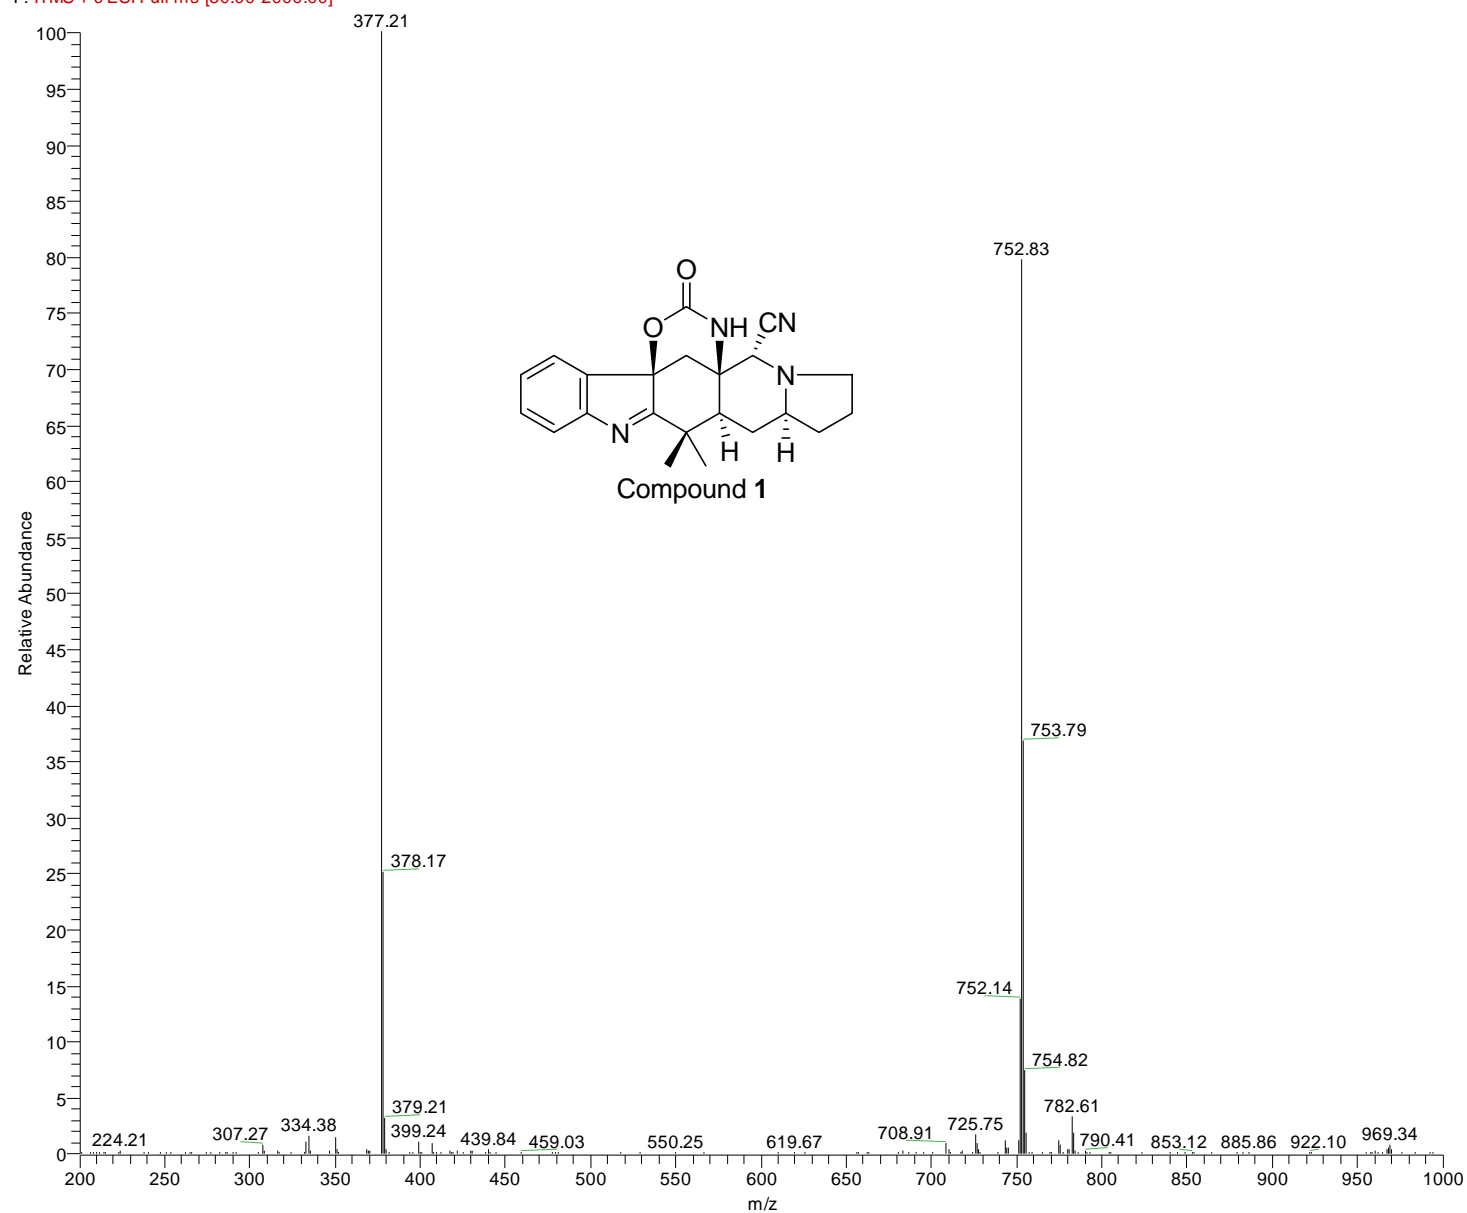



DL29-5 #1356 RT: 24.17 AV: 1 NL: 2.72E3  
F: ITMS - c ESI Full ms [50.00-2000.00]

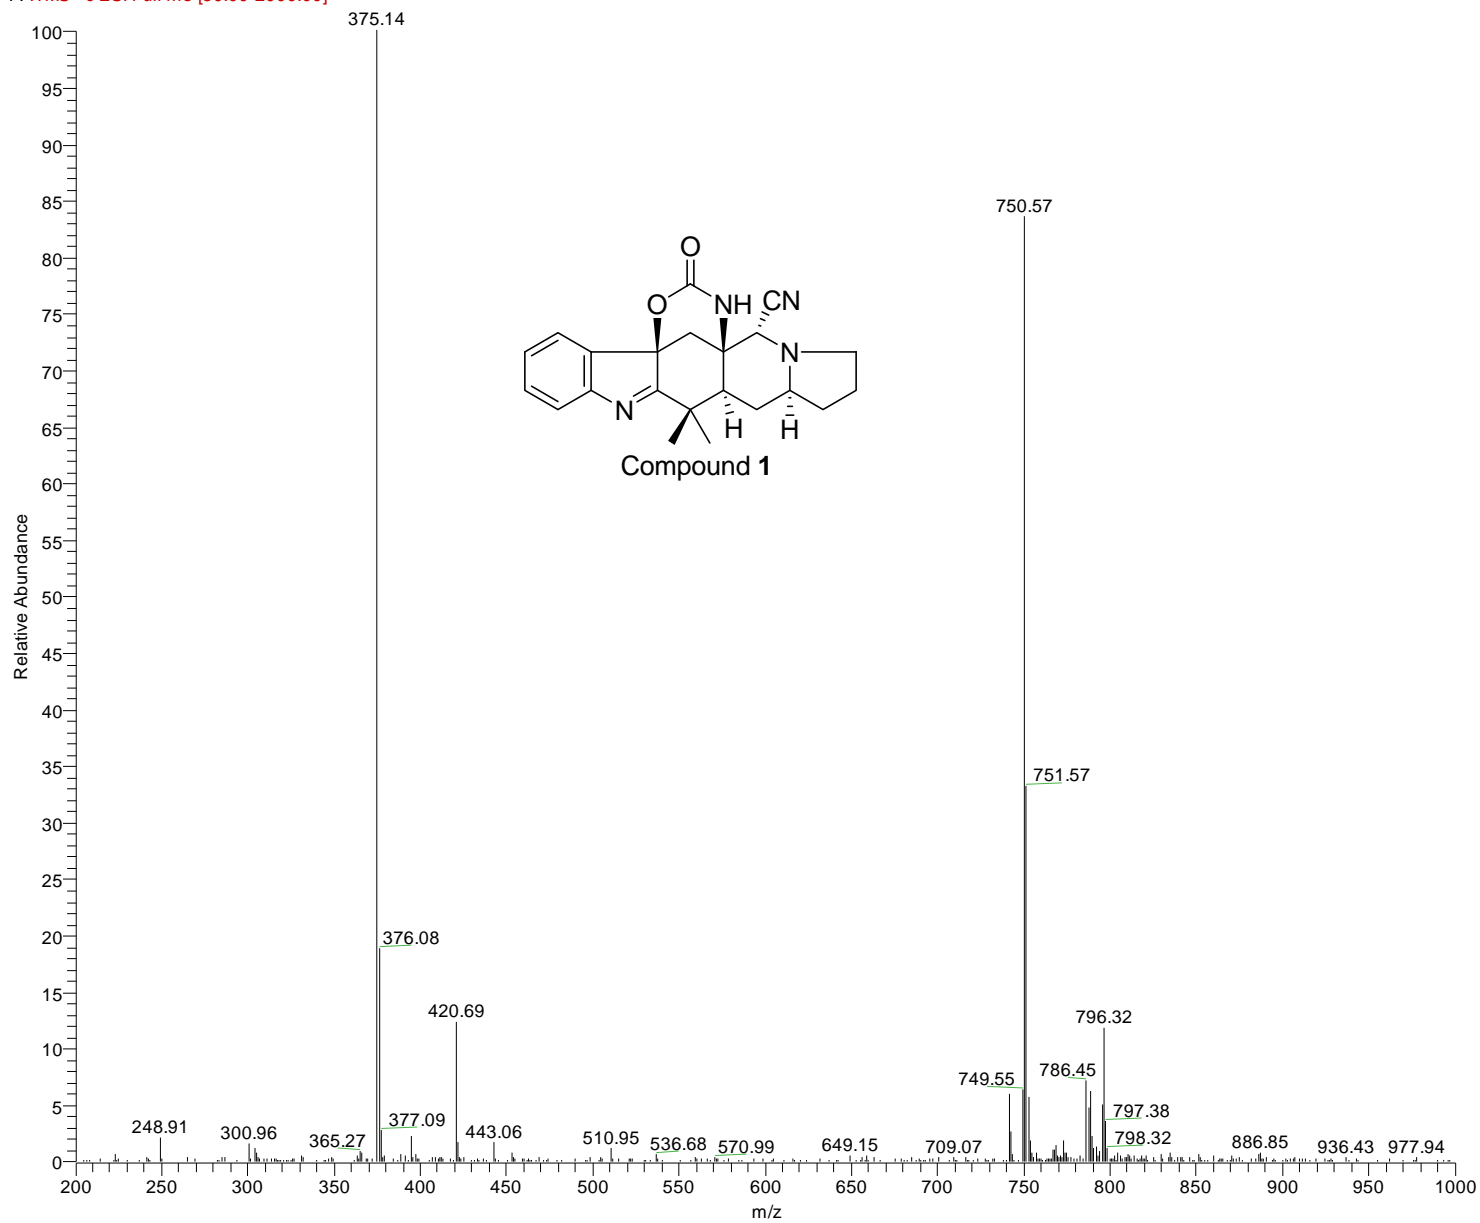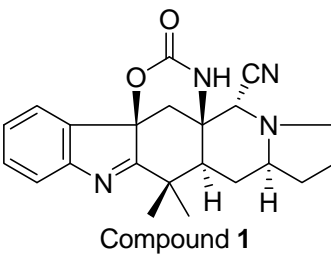

DL29-5

12:08:26 10-May-2012

M120510E-02 40 (2.943) Cm (34:40-8:17)

KIB

Autospec Premier

P776

Magnet EI+

3.24e4

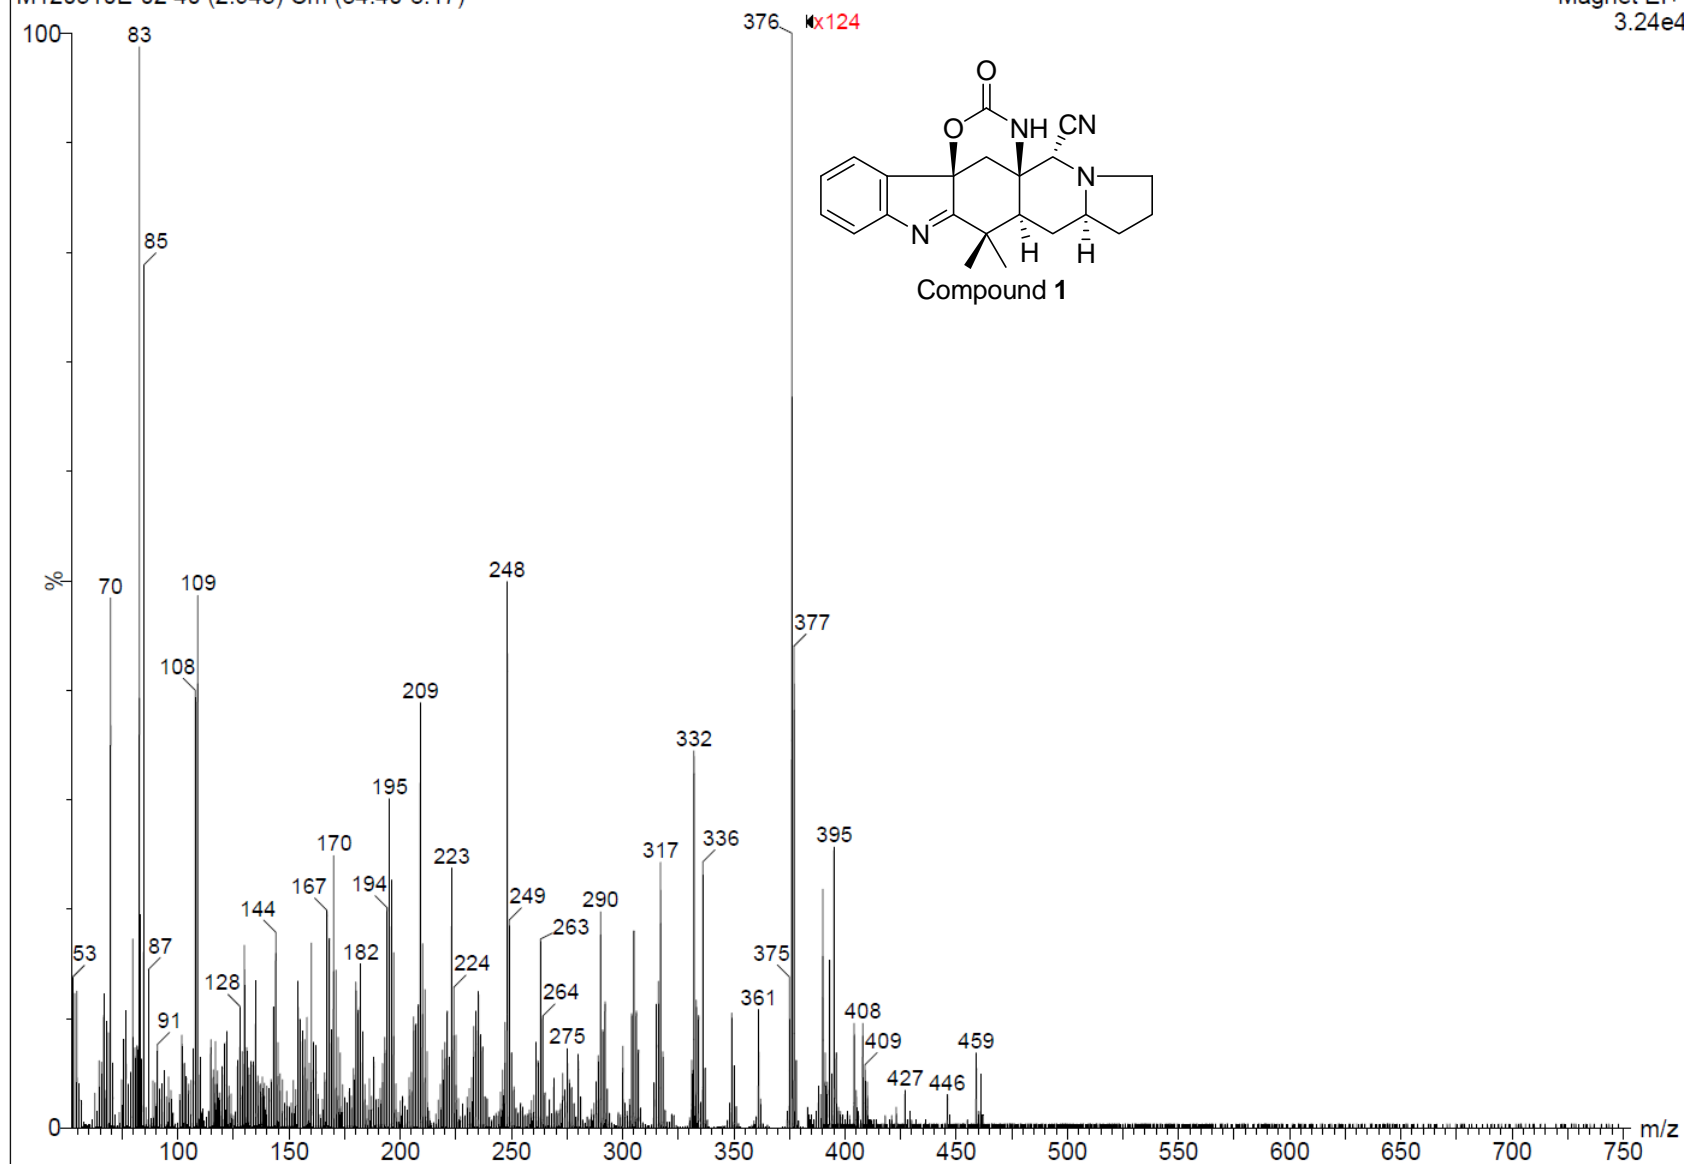

## Elemental Composition Report

### Single Mass Analysis

Tolerance = 10.0 mDa / DBE: min = 0.5, max = 120.0

Selected filters: None

Monoisotopic Mass, Odd and Even Electron Ions

55 formula(e) evaluated with 1 results within limits (up to 51 closest results for each mass)

DL29-5  
15:15:17 10-May-2012  
Voltage EI+

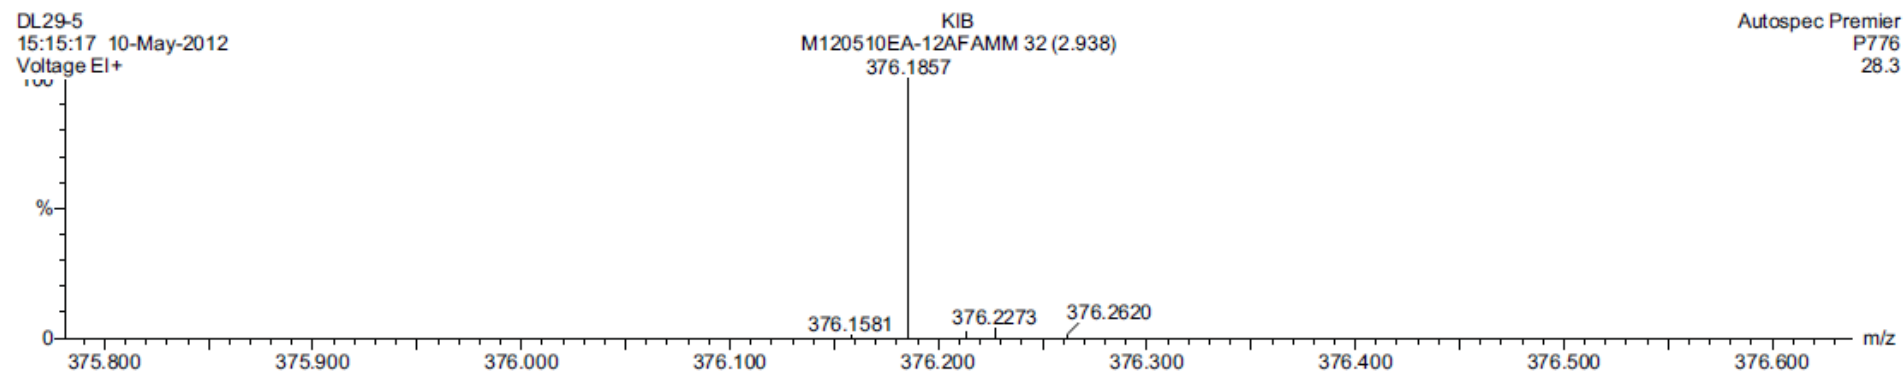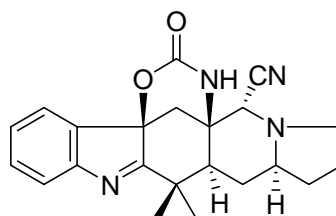

Compound 1



Cartesian coordinates of the energy-minimized conformer of compound **1** optimized at the gas-phase B3LYP/6-31G(d) level

| Center<br>Number | Atomic<br>Number | Atomic<br>Type | Coordinates (Angstroms) |           |           |
|------------------|------------------|----------------|-------------------------|-----------|-----------|
|                  |                  |                | X                       | Y         | Z         |
| 1                | 6                | 0              | 5.197100                | -1.728079 | -0.157001 |
| 2                | 6                | 0              | 5.699298                | -0.637278 | -0.872601 |
| 3                | 6                | 0              | 4.902297                | 0.484821  | -1.136101 |
| 4                | 6                | 0              | 3.597197                | 0.475319  | -0.661601 |
| 5                | 6                | 0              | 3.086898                | -0.623981 | 0.044200  |
| 6                | 6                | 0              | 3.874600                | -1.730580 | 0.313000  |
| 7                | 7                | 0              | 2.630896                | 1.512018  | -0.814501 |
| 8                | 6                | 0              | 1.559596                | 1.133817  | -0.209601 |
| 9                | 6                | 0              | 1.658098                | -0.290883 | 0.387600  |
| 10               | 6                | 0              | 0.264295                | 1.919715  | -0.195101 |
| 11               | 6                | 0              | -0.929004               | 0.926013  | -0.496601 |
| 12               | 6                | 0              | -0.763302               | -0.515686 | 0.092400  |
| 13               | 6                | 0              | 0.583699                | -1.131185 | -0.301701 |
| 14               | 6                | 0              | -2.313104               | 1.493311  | -0.117401 |
| 15               | 6                | 0              | -3.434903               | 0.543710  | -0.535601 |
| 16               | 7                | 0              | -3.198301               | -0.792690 | 0.038300  |
| 17               | 6                | 0              | -1.953401               | -1.407588 | -0.386001 |
| 18               | 6                | 0              | -4.844504               | 0.865808  | -0.016700 |
| 19               | 6                | 0              | -5.551702               | -0.516593 | 0.075300  |
| 20               | 6                | 0              | -4.433800               | -1.558891 | -0.168701 |
| 21               | 6                | 0              | 0.140494                | 2.655915  | 1.169100  |
| 22               | 6                | 0              | 0.307194                | 2.993215  | -1.303001 |
| 23               | 8                | 0              | 1.493198                | -0.345284 | 1.823300  |
| 24               | 7                | 0              | -0.811602               | -0.546187 | 1.550700  |
| 25               | 1                | 0              | -0.922204               | 0.786713  | -1.587801 |
| 26               | 1                | 0              | -3.462303               | 0.481810  | -1.640901 |
| 27               | 6                | 0              | -1.895100               | -1.662288 | -1.853301 |
| 28               | 6                | 0              | 0.256398                | -0.438385 | 2.401700  |
| 29               | 8                | 0              | 0.154698                | -0.421185 | 3.608600  |
| 30               | 7                | 0              | -1.906300               | -1.849588 | -2.999601 |
| 31               | 1                | 0              | 5.838101                | -2.582578 | 0.040500  |
| 32               | 1                | 0              | 6.726298                | -0.657977 | -1.227001 |
| 33               | 1                | 0              | 5.284196                | 1.338921  | -1.686401 |
| 34               | 1                | 0              | 3.489901                | -2.573581 | 0.880800  |
| 35               | 1                | 0              | 0.727799                | -1.106185 | -1.385901 |
| 36               | 1                | 0              | 0.644800                | -2.174885 | 0.029900  |
| 37               | 1                | 0              | -2.464706               | 2.468111  | -0.594101 |
| 38               | 1                | 0              | -2.372805               | 1.650111  | 0.965600  |
| 39               | 1                | 0              | -1.855899               | -2.379488 | 0.113700  |
| 40               | 1                | 0              | -4.775904               | 1.327508  | 0.974400  |
| 41               | 1                | 0              | -5.367605               | 1.566908  | -0.673401 |
| 42               | 1                | 0              | -6.011202               | -0.653393 | 1.058000  |
| 43               | 1                | 0              | -6.344302               | -0.621594 | -0.670801 |
| 44               | 1                | 0              | -4.493100               | -1.954591 | -1.196801 |
| 45               | 1                | 0              | -4.472499               | -2.408891 | 0.521000  |
| 46               | 1                | 0              | 1.031293                | 3.273216  | 1.323100  |
| 47               | 1                | 0              | -0.727007               | 3.323814  | 1.161400  |
| 48               | 1                | 0              | 0.045395                | 1.991815  | 2.029500  |
| 49               | 1                | 0              | -0.621007               | 3.574714  | -1.313901 |
| 50               | 1                | 0              | 0.448194                | 2.541715  | -2.290001 |
| 51               | 1                | 0              | 1.140493                | 3.680116  | -1.135901 |
| 52               | 1                | 0              | -1.722002               | -0.526788 | 1.991800  |

Correlation between experimental (in CDCl<sub>3</sub>) and calculated (in gas phase) <sup>13</sup>C NMR data for the C-6 epimer of compound **1**

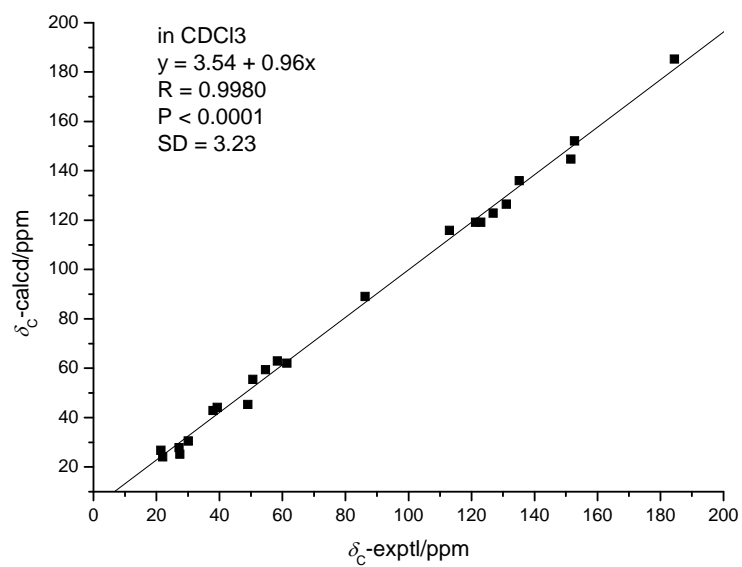

Supplement: Supplementary file 1 [file 4054015]
